# Supplementary material for: Functional DNA methylation signatures for autism spectrum disorder genomic risk loci: 16p11.2 deletions and CHD8 variants
Source: Clin Epigenetics. 2019 Jul 16;11:103. doi: 10.1186/s13148-019-0684-3 (PMC6636171; doi:10.1186/s13148-019-0684-3)
Supplement: Supplementary file 3 — Table S1. Demographic information for heterogeneous ASD cases and age- and sex-matched neurotypical controls. Table S2. Number of probes removed and remaining for analysis following quality control. Table S3. List of overlapping DMRs for 16p11.2del. Table S4. List of overlapping DMRs for CHD8+/−. Table S5. List of samples extracted from GEO database and respective 16p11.2del and CHD8+/− signature scores for specificity analysis. All sample data are from blood and from individuals with known ages < 50 years old. Table S6. List of significant (q < 0.05, |Δβ| ≥ 5%) sites in 16p11.2del DNAm signature. Table S7. List of significant (q < 0.05, |Δβ| ≥ 5%) sites in CHD8+/− DNAm signature. Table S8. GO Biological Process enrichment terms following GREAT enrichment analysis of differentially methylated genes in 16p11.2del DNAm signature. Table S9. GO Biological Process enrichment terms following GREAT enrichment analysis of differentially methylated genes in CHD8+/− DNAm signature. (XLSX 156 kb) [file 13148_2019_684_MOESM3_ESM.xlsx]

## Sheet: Supp. Table 1
Supplementary Table 1. Demographic information for heterogeneous ASD cases and age- and sex-matched neurotypical controls.
Sample ID	Group	Sex	Age (y)
1-0584-003	ASD	M	8
1-0607-003	ASD	F	15
1-0219-003	ASD	M	13
1-0617-003	ASD	M	11
12130.p1	ASD	F	6.75
1-0614-003	ASD	M	8
1-0612-003	ASD	M	4
11033.p1	ASD	M	8
11282.p1	ASD	M	8.75
1-0613-003	ASD	M	9
1-0620-003	ASD	F	6
1-0610-003	ASD	M	17
1-0465-003	ASD	M	9
1-0644-003	ASD	M	12
1-0631-003	ASD	M	11
1-0643-003	ASD	F	12
1-0601-003	ASD	F	11
1-0232-004	ASD	M	11
1-0627-003	ASD	M	10
1-0628-003	ASD	M	16
1-0630-003	ASD	M	7
1-0680-003	ASD	M	10
1-0602-003	ASD	M	10
1-0186-004	ASD	M	12
1-0618-003	ASD	M	14
1-0186-005	ASD	M	12
1-0716-003	ASD	M	10
1-0682-003	ASD	M	8
1-0703-003	ASD	M	8
1-0228-003	ASD	M	13
1-0633-003	ASD	M	16
1-0578-003	ASD	M	14
1-0678-003	ASD	M	16
1-0458-003	ASD	M	15
1-0667-003	ASD	F	8
1-0675-003	ASD	M	11
1-0681-003	ASD	F	6
7-0002-003	ASD	M	6
1-0700-003	ASD	M	13
1-0710-003	ASD	M	6
1-0722-003	ASD	M	7
1-0665-003	ASD	M	7
1-0780-003	ASD	M	6
1-0749-003	ASD	M	11
1-0754-003	ASD	M	10
1-0761-003	ASD	M	11
1-0784-003	ASD	M	9
11-0009-003	ASD	M	17
11-0027-003	ASD	M	6
1-0748-003	ASD	M	10
1-0763-003	ASD	M	14
2-0272-003	ASD	M	14
EP48W	Control	F	11
EP51	Control	M	12
EP58W	Control	M	15
EP60W	Control	M	12
EP41W	Control	M	16
EH-268W	Control	F	6
EM-440/1993	Control	F	14
JS-265W	Control	M	16
EP34W	Control	F	13
RJ-258W	Control	M	13
TG-278W	Control	M	13
460/2048	Control	M	11.5
TB-342/1706	Control	M	16
BB-236	Control	M	16
CG-092	Control	M	15
EP43W	Control	F	7
GP-112	Control	M	15.5
EP47W	Control	F	6
JB-042	Control	M	13.5
EP32W	Control	M	6
JL-137/1362	Control	M	14
EP45W	Control	M	10
EP56W	Control	F	3
EP59W	Control	M	6
EP57W	Control	M	7
AD-350/ 1728	Control	M	14
CT0009-003	Control	M	8
CB-314/1610	Control	M	16
CT0011-003	Control	M	4
FH-225	Control	M	13
Mean age ASD	10.45 ± 3.306
Mean age Control	11.42 ± 4.062
ASD M,F	45,7
Control M,F	23,7

## Sheet: Supp. Table 2
Supplementary Table 2. Number of probes removed and remaining for analysis following quality control.
We excluded probes located on sex chromosomes, autosomal probes that cross-react with sex chromosome probes, non-specific probes, probes targeting CpG sites within 5bp of a SNP that has a minor allele frequency above 1%, and probes with missing values or detection P values >0.01 and nonspecific probes (See Chen et al., 2013 for more details).
Group	# probes removed	# probes remaining for analysis
Heterogeneous ASD	113436	372141
16p11.2del	78311	407266
CHD8+/-	77778	407799

## Sheet: Supp. Table 3
Supplmentary Table 3. DMRs overlapping at least one significantly differentially methylated site in the 16p11.2del signature.
chr	start	end	ave_delta_beta	num_CpGs	p.value	CpGs	dmrGenes	Signature CpGs
chr12	75784541	75785295	0.160434	9	5.78595e-05	cg20291222:cg00108944:cg23588049:cg12351126:cg02415057:cg07311024:cg02071292:cg21272279:cg17050806	GLIPR1L2	cg00108944;cg02071292;cg02415057;cg07311024;cg12351126;cg17050806;cg21272279;cg23588049;
chr1	152161237	152162025	-0.139889	7	0.000298717	cg15025200:cg23107878:cg26320663:cg09127314:cg02754945:cg13498757:cg21280320		cg23107878;
chr13	31506685	31507139	-0.136188	7	0.000330337	cg16290689:cg02247178:cg10923408:cg13614409:cg00424169:cg24856064:cg08379987	C13orf26	cg00424169;cg10923408;cg13614409;cg16290689;
chr6	49681178	49681774	-0.10062	9	0.000610889	cg14997592:cg04595372:cg25390787:cg26715042:cg08942800:cg01076129:cg12440062:cg21710255:cg01706515	CRISP2	cg08942800;
chr10	99734416	99735202	0.099318	7	0.00123254	cg14120919:cg19421526:cg03379552:cg06324373:cg23504719:cg23245905:cg08930881	CRTAC1	cg06324373;cg23504719;
chr20	30073399	30073576	-0.10624	5	0.00190869	cg15537254:cg13159946:cg02991085:cg25502144:cg21846177	NCRNA00028	cg02991085;cg13159946;cg15537254;cg21846177;cg25502144;
chr12	124873347	124874007	0.143075	3	0.00223499	cg24975642:cg12154538:cg14951136	NCOR2	cg12154538;cg24975642;
chr2	85811421	85812023	0.117061	4	0.00276851	cg16719560:cg11108890:cg16865965:cg25651505	VAMP5	cg11108890;cg16719560;cg16865965;cg25651505;
chr18	23713626	23714084	-0.0876461	6	0.0025142	cg25983544:cg06377543:cg03162994:cg00262344:cg15865827:cg21248196	PSMA8	cg06377543;cg21248196;cg25983544;
chr6	74063982	74064594	-0.0824959	6	0.00313047	cg01652244:cg15414745:cg23414861:cg09071762:cg02931604:cg16783571	DPPA5	cg09071762;
chr9	139091650	139092974	0.0756659	6	0.00405622	cg14381623:cg14277923:cg08967938:cg21192468:cg25952247:cg17270081	LHX3	cg17270081;
chr20	61447036	61447276	0.11501	3	0.00565543	cg11296498:cg14880348:cg15457981	COL9A3	cg11296498;cg14880348;cg15457981;
chr1	227746191	227746453	-0.113611	3	0.00595078	cg08111158:cg22344745:cg12133451		cg08111158;
chr1	228890820	228891306	-0.0940336	4	0.00669488	cg20462561:cg23926439:cg25138412:cg00850481		cg20462561;cg23926439;
chr8	38831598	38832728	-0.0677669	6	0.00527934	cg18990313:cg12535715:cg15046062:cg27258399:cg04771100:cg00672936	HTRA4	cg12535715;
chr1	46088486	46089024	-0.107221	3	0.00750559	cg06687305:cg03335125:cg14220678	CCDC17	cg03335125;cg06687305;cg14220678;
chr1	150947949	150948030	-0.0975681	3	0.0109233	cg22012583:cg13073141:cg05630111	LASS2	cg05630111;cg13073141;cg22012583;
chr3	52351355	52351963	-0.0927723	3	0.0132236	cg10313047:cg12902206:cg22084642	DNAH1	cg10313047;
chr1	182921688	182921857	-0.0905779	3	0.014446	cg13112404:cg02710296:cg08787039	C1orf14	cg13112404;
chr1	236686564	236686804	-0.069079	5	0.00895544	cg01030476:cg05338187:cg18322510:cg09334514:cg08137948	LGALS8	cg08137948;cg09334514;
chr20	36148620	36149081	-0.0766802	4	0.01334	cg22551578:cg22943498:cg15473473:cg24675557	BLCAP:NNAT	cg24675557;
chr5	3787906	3787948	-0.081543	3	0.021151	cg01927921:cg09491536:cg23998650		cg01927921;cg09491536;
chr12	132903921	132904540	0.074964	3	0.0279488	cg10052597:cg01345136:cg25283121	GALNT9	cg25283121;
chr7	57484153	57484635	-0.0748053	3	0.0281406	cg08444117:cg07788167:cg10720000		cg07788167;
chr10	133251574	133252332	0.070735	3	0.0335054	cg14435498:cg13584272:cg20586076		cg14435498;
chr2	25427108	25427451	-0.0706709	3	0.0335922	cg20422417:cg02757970:cg13349472		cg13349472;

## Sheet: Supp. Table 4
Supplmentary Table 4. DMRs overlapping at least one significantly differentially methylated site in the CHD8+/- signature.
chr	start	end	ave_delta_beta	num_CpGs	p.value	CpGs	dmrGenes	Signature CpGs
chr6	33282867	33283070	-0.111565	12	0.000133033	cg10376053:cg14288848:cg17055704:cg14473643:cg14309283:cg07895437:cg26646118:cg10134527:cg25954512:cg07245868:cg14096569:cg18144560	TAPBP:ZBTB22	cg07895437;cg14473643;cg14288848;cg17055704;cg10134527;cg10376053;cg18144560;cg07245868;cg26646118;cg25954512;cg14096569;
chr17	47091339	47092272	-0.144492	7	0.000198341	cg20966754:cg07075026:cg22947322:cg10950924:cg11673840:cg18128536:cg25220979	IGF2BP1	cg25220979;
chr17	37123638	37123949	-0.112101	9	0.000369349	cg22361859:cg14399930:cg16530382:cg26740942:cg10600889:cg00055529:cg04120272:cg23965214:cg06711380	FBXO47	cg14399930;
chr14	34268920	34270437	0.122953	7	0.000408533	cg09224393:cg00243480:cg03839794:cg23295647:cg09819656:cg15089111:cg01993818	NPAS3	cg09819656;cg15089111;
chr1	1564422	1565027	-0.123379	6	0.000519798	cg00078456:cg18852096:cg05642789:cg17122213:cg03427058:cg23430652	MIB2	cg18852096;
chr22	50737978	50738890	-0.139212	4	0.000803038	cg12244647:cg27206976:cg22445712:cg04089788	PLXNB2	cg22445712;cg27206976;cg12244647;cg04089788;
chr22	18632404	18632433	-0.153553	3	0.00100718	cg27281093:cg18699242:cg01963623	USP18	cg18699242;cg01963623;cg27281093;
chr17	70120182	70120541	-0.133258	4	0.000964613	cg03917138:cg10471574:cg21049501:cg06234051	SOX9	cg03917138;
chr12	58119918	58120237	-0.119015	4	0.00159035	cg01834979:cg11511175:cg23387569:cg14845962	AGAP2:LOC100130776	cg01834979;cg14845962;
chr1	7887199	7887560	-0.118171	4	0.00163075	cg17328665:cg17724687:cg08926642:cg09168692	PER3	cg17328665;
chr20	62406428	62406964	-0.117965	4	0.00164163	cg14251267:cg16737517:cg18369516:cg12283398	ZBTB46	cg18369516;cg12283398;
chr1	27675934	27676652	-0.117249	4	0.00167888	cg08157684:cg12748890:cg03750567:cg00851518	SYTL1	cg12748890;cg03750567;
chr19	49077983	49078119	-0.130415	3	0.00209806	cg14328676:cg21196201:cg10262032	SULT2B1	cg14328676;
chr5	149546331	149546471	-0.0977519	5	0.001854	cg17378342:cg17512474:cg18424208:cg11117637:cg15452204	CDX1	cg15452204;
chr16	10912478	10912718	-0.0969913	5	0.00190576	cg03309770:cg26952618:cg02007567:cg09175009:cg09684846	FAM18A	cg09684846;
chr11	69285980	69286352	-0.0941812	5	0.00209951	cg05499178:cg01969701:cg21408915:cg15442037:cg18498241		cg01969701;cg15442037;cg05499178;cg21408915;
chr11	72532891	72533664	-0.126001	3	0.00244298	cg21806242:cg13771313:cg00979931	ATG16L2	cg13771313;cg00979931;
chr7	98990265	98991138	-0.104502	4	0.00258665	cg11699265:cg10119082:cg10428938:cg05715492	ARPC1B	cg10428938;cg11699265;cg10119082;
chr19	45594410	45594670	-0.122495	3	0.00274774	cg18383668:cg08436089:cg03270332	GEMIN7	cg18383668;cg08436089;
chr12	51236582	51236768	-0.0789216	6	0.00217764	cg02956274:cg25213362:cg27261219:cg15169829:cg01020079:cg12439325	TMPRSS12	cg12439325;cg25213362;cg01020079;cg27261219;cg15169829;
chr12	123380870	123381003	-0.0922738	5	0.00225092	cg24691904:cg10848724:cg03434624:cg06634460:cg24664957	VPS37B	cg06634460;cg10848724;cg03434624;cg24664957;
chr6	31913759	31913814	-0.0997731	4	0.00307525	cg22670819:cg07421596:cg06060835:cg00381684	CFB	cg22670819;cg00381684;cg06060835;cg07421596;
chr3	107810507	107810791	-0.0889588	5	0.00253852	cg25881170:cg11741004:cg02487233:cg00492070:cg06806080	CD47	cg25881170;cg02487233;cg11741004;cg00492070;cg06806080;
chr17	7311314	7312081	-0.0706342	6	0.00281474	cg00061695:cg15660077:cg10092265:cg09568217:cg09711113:cg08870143	NLGN2	cg09568217;cg08870143;cg09711113;cg15660077;
chr6	31508106	31508318	0.0685724	6	0.00296229	cg24124954:cg24332685:cg21179831:cg08463024:cg11489251:cg24631162	BAT1	cg21179831;cg24124954;cg11489251;cg24631162;cg08463024;
chr2	43903650	43904011	-0.0973752	4	0.00336091	cg02111748:cg20563666:cg14454477:cg08726338	LOC728819:PLEKHH2	cg14454477;
chr19	3006111	3006720	-0.110811	3	0.00404591	cg26717563:cg19334452:cg00857137	TLE2	cg19334452;cg26717563;cg00857137;
chr19	55889013	55889387	-0.0942934	4	0.00375227	cg19402371:cg06693983:cg01695406:cg25293806	TMEM190	cg06693983;cg25293806;cg01695406;
chr4	174421114	174422043	-0.0736487	5	0.00439808	cg21401642:cg08814800:cg17139666:cg02307239:cg23091159		cg21401642;
chr2	152830505	152830665	-0.0683214	5	0.00520959	cg08719380:cg11025974:cg21376136:cg06686709:cg27664689	CACNB4	cg11025974;cg08719380;
chr11	67982143	67982703	-0.0822635	4	0.00587451	cg01225565:cg11117460:cg13699479:cg20092736	SUV420H1	cg20092736;cg11117460;cg01225565;cg13699479;
chr11	43290958	43291188	-0.0779049	4	0.00694483	cg00233420:cg00258081:cg26999154:cg05920383		cg05920383;
chr16	67233432	67233983	-0.0758281	4	0.00749945	cg19514469:cg07716847:cg06494642:cg08721338	ELMO3	cg07716847;cg19514469;
chr13	113784082	113784663	-0.0753397	4	0.00763926	cg17835016:cg23389023:cg21860560:cg08143875	F10	cg08143875;cg17835016;
chr2	179387853	179388064	-0.100105	3	0.0059033	cg04220104:cg19916659:cg17740434	MIR548N	cg19916659;
chr7	149112402	149112961	-0.0738496	4	0.00806472	cg11213690:cg23397023:cg07928883:cg04755995		cg23397023;cg11213690;cg07928883;
chr19	49220102	49220235	-0.0727866	4	0.00838787	cg15475323:cg18046677:cg14103343:cg12234455	MAMSTR	cg12234455;cg15475323;cg18046677;cg14103343;
chr6	33283145	33283162	-0.0962143	3	0.00680526	cg08771019:cg11917542:cg03000593	TAPBP:ZBTB22	cg08771019;cg11917542;cg03000593;
chr10	88718274	88718393	-0.0956277	3	0.00695668	cg09552892:cg03677069:cg21012874	MMRN2:SNCG	cg03677069;cg21012874;
chr19	57702442	57702652	-0.0713628	4	0.00884503	cg10368128:cg16636110:cg27176357:cg08047939	ZNF264	cg16636110;cg08047939;
chr20	50418554	50419082	-0.0944894	3	0.0072583	cg00169792:cg06303238:cg19871388	SALL4	cg06303238;cg19871388;
chr6	28558006	28558113	-0.0701137	4	0.00921752	cg05301470:cg26977936:cg12934884:cg25679766		cg05301470;
chr8	144654887	144655447	-0.0923009	3	0.00789517	cg14809332:cg26536354:cg24351694	C8orf73	cg14809332;
chr12	49504967	49505053	-0.0896447	3	0.00872868	cg11599830:cg21747160:cg04949149	LMBR1L	cg11599830;cg21747160;
chr3	52351355	52351680	0.0887302	3	0.00905715	cg10313047:cg12902206:cg13476950	DNAH1	cg12902206;
chr2	43903470	43903526	-0.0843863	3	0.0107266	cg09325404:cg11267669:cg14230606	LOC728819:PLEKHH2	cg14230606;cg11267669;
chr13	49792767	49793170	-0.0811566	3	0.0122149	cg06396119:cg05077231:cg07447742	MLNR	cg06396119;cg05077231;
chr14	103388859	103389022	-0.0797816	3	0.0129187	cg07378067:cg25017060:cg24810305	AMN	cg25017060;
chr15	99987871	99987955	-0.0795446	3	0.013045	cg00206639:cg11433098:cg10730435		cg00206639;cg10730435;
chr22	31536476	31536585	-0.0781607	3	0.0137847	cg25937577:cg05815196:cg25137841	PLA2G3	cg25937577;cg05815196;
chr4	77723057	77723304	-0.0781059	3	0.0138195	cg14160968:cg27446137:cg00937681		cg14160968;
chr6	53530503	53530628	-0.0581612	4	0.0123687	cg00536792:cg19801120:cg06485521:cg13840445	KLHL31	cg19801120;cg00536792;cg13840445;cg06485521;
chr4	23892515	23892621	-0.0765737	3	0.0147154	cg11270806:cg27514608:cg27461259	PPARGC1A	cg27461259;
chr6	30684478	30684736	-0.0762989	3	0.0148818	cg21105955:cg10925640:cg07257768	MDC1	cg21105955;
chr5	150326521	150326862	-0.0762706	3	0.0149017	cg04755771:cg18428283:cg08747963	LOC134466	cg04755771;
chr17	44928210	44928516	-0.0755822	3	0.015301	cg17881353:cg07993743:cg20769177	WNT9B	cg07993743;
chr1	100111713	100111849	-0.0744608	3	0.0160039	cg00729875:cg07960762:cg24603803	PALMD	cg00729875;cg07960762;
chr13	46425929	46426026	-0.0726927	3	0.0171572	cg12979844:cg02017534:cg25658983	SIAH3	cg25658983;cg12979844;cg02017534;
chr19	43969650	43969886	-0.0538968	4	0.0127678	cg25340403:cg07643267:cg04259907:cg24950222	LYPD3	cg24950222;
chr2	198540518	198540621	-0.0706338	3	0.0186174	cg23334662:cg09096031:cg08373610	RFTN2	cg08373610;
chr3	50403130	50403287	-0.070211	3	0.0189152	cg25821785:cg07129669:cg23525596	CACNA2D2	cg25821785;cg23525596;cg07129669;
chr17	19771548	19771783	-0.0695551	3	0.0193631	cg12324629:cg17665699:cg04036329	ULK2	cg17665699;cg12324629;
chr11	417578	417643	-0.0660536	3	0.0219711	cg19202014:cg11624233:cg02996181	SIGIRR	cg19202014;
chr3	49967517	49967713	-0.0644408	3	0.0232022	cg03484180:cg21583668:cg21813538	MON1A	cg03484180;cg21583668;
chr12	54454252	54454445	-0.0635922	3	0.0238188	cg11795276:cg24392955:cg03199745	FLJ12825	cg24392955;
chr10	89264080	89264128	-0.060322	3	0.0261981	cg20165416:cg16694639:cg10767045	MINPP1	cg16694639;cg10767045;
chr7	114561988	114562063	-0.0587529	3	0.0272327	cg10436410:cg23468130:cg16886175	MDFIC	cg10436410;
chr5	145758782	145758881	-0.0572011	3	0.0280732	cg11334165:cg08352755:cg26607337		cg08352755;
chr10	102896475	102896869	0.0554198	3	0.0288324	cg01175020:cg06382559:cg20120208	TLX1	cg06382559;
chr6	29595194	29595315	-0.0539563	3	0.0292603	cg05812266:cg08093277:cg08862148	GABBR1	cg05812266;

## Sheet: Supp. Table 5
Supplementary Table 5. List of GEO controls (blood, known ages <50) and respective 16p11.2del and CHD8+/- signature scores.
GEO Series Accession #	GEO control ID	16p11.2del Score	CHD8+/- Score	Age (y)	Reference
GSE41169	GSM1009666	-0.09432	-0.01484	21	Horvath et al., 2012
GSE41169	GSM1009667	-0.11369	-0.03886	21	Horvath et al., 2012
GSE41169	GSM1009668	-0.15095	-0.04111	21	Horvath et al., 2012
GSE41169	GSM1009674	-0.1116	-0.03011	49	Horvath et al., 2012
GSE41169	GSM1009677	-0.16978	-0.03959	33	Horvath et al., 2012
GSE41169	GSM1009681	-0.12313	-0.01125	29	Horvath et al., 2012
GSE41169	GSM1009685	-0.07697	-0.01861	32	Horvath et al., 2012
GSE41169	GSM1009686	-0.13499	-0.01686	36	Horvath et al., 2012
GSE41169	GSM1009687	-0.14794	-0.01889	27	Horvath et al., 2012
GSE41169	GSM1009688	-0.12687	-0.01958	23	Horvath et al., 2012
GSE41169	GSM1009689	-0.17643	-0.03546	26	Horvath et al., 2012
GSE41169	GSM1009690	-0.14209	-0.03942	38	Horvath et al., 2012
GSE41169	GSM1009691	-0.15045	-0.03572	28	Horvath et al., 2012
GSE41169	GSM1009692	-0.1302	-0.03657	30	Horvath et al., 2012
GSE41169	GSM1009693	-0.13039	-0.01343	21	Horvath et al., 2012
GSE41169	GSM1009694	-0.11417	-0.04405	26	Horvath et al., 2012
GSE41169	GSM1009695	-0.13659	-0.04195	24	Horvath et al., 2012
GSE41169	GSM1009697	-0.16808	-0.04013	40	Horvath et al., 2012
GSE41169	GSM1009723	-0.11567	-0.01465	19	Horvath et al., 2012
GSE41169	GSM1009727	-0.18045	-0.01347	34	Horvath et al., 2012
GSE41169	GSM1009739	-0.09794	-0.04973	29	Horvath et al., 2012
GSE41169	GSM1009742	-0.12015	-0.01862	25	Horvath et al., 2012
GSE41169	GSM1009743	-0.10126	-0.04196	27	Horvath et al., 2012
GSE41169	GSM1009744	-0.10857	-0.03254	20	Horvath et al., 2012
GSE41169	GSM1009745	-0.092	-0.04684	25	Horvath et al., 2012
GSE41169	GSM1009746	-0.08655	-0.04355	24	Horvath et al., 2012
GSE41169	GSM1009747	-0.13248	-0.00765	18	Horvath et al., 2012
GSE41169	GSM1009748	-0.1119	-0.04263	20	Horvath et al., 2012
GSE41169	GSM1009749	-0.15508	-0.01853	26	Horvath et al., 2012
GSE41169	GSM1009892	-0.13037	-0.01518	29	Horvath et al., 2012
GSE41169	GSM1009893	-0.10046	-0.04555	29	Horvath et al., 2012
GSE46648	GSM1133590	-0.08838	-0.04385	28	de la Rica et al., 2013
GSE46648	GSM1133591	-0.12466	-0.03779	27	de la Rica et al., 2013
GSE46648	GSM1133592	-0.0998	-0.01862	29	de la Rica et al., 2013
GSE53128	GSM1282781	-0.15906	-0.04184	47.2772	Bell JT (publication not available)
GSE53128	GSM1282782	-0.14027	-0.04278	47.2772	Bell JT (publication not available)
GSE32148	GSM796661	-0.11207	-0.05275	49	Harris et al., 2012
GSE32148	GSM796662	-0.14874	-0.04749	43	Harris et al., 2012
GSE32148	GSM796665	-0.17238	-0.03747	44	Harris et al., 2012
GSE32148	GSM796666	-0.12345	-0.03714	3.5	Harris et al., 2012
GSE32148	GSM796667	-0.1147	-0.01675	13.5	Harris et al., 2012
GSE32148	GSM796668	-0.07253	-0.02731	14	Harris et al., 2012
GSE32148	GSM796669	-0.10913	-0.02237	15	Harris et al., 2012
GSE32148	GSM796670	-0.09585	-0.04426	16.5	Harris et al., 2012
GSE32148	GSM796671	-0.15743	-0.04371	17	Harris et al., 2012
GSE32148	GSM796672	-0.11951	-0.02997	17	Harris et al., 2012
GSE32148	GSM796673	-0.1323	-0.02524	17.5	Harris et al., 2012
GSE32148	GSM796674	-0.18816	-0.03735	8	Harris et al., 2012
GSE32148	GSM796675	-0.15163	-0.01822	12	Harris et al., 2012
GSE32148	GSM796676	-0.11323	-0.0179	13	Harris et al., 2012
GSE32148	GSM796677	-0.14388	-0.03168	10	Harris et al., 2012
GSE32148	GSM796678	-0.19118	-0.03975	5	Harris et al., 2012
GSE32148	GSM796679	-0.19579	-0.04787	8	Harris et al., 2012
GSE40279	GSM989838	-0.1033	-0.04812	48	Hannum et al., 2013
GSE40279	GSM989885	-0.12573	-0.01511	47	Hannum et al., 2013
GSE40279	GSM989917	-0.14579	-0.04579	49	Hannum et al., 2013
GSE40279	GSM989936	-0.12472	-0.04409	49	Hannum et al., 2013
GSE40279	GSM989940	-0.08284	-0.00537	46	Hannum et al., 2013
GSE40279	GSM989947	-0.11534	-0.03692	48	Hannum et al., 2013
GSE40279	GSM989948	-0.07226	-0.04327	45	Hannum et al., 2013
GSE40279	GSM989965	-0.13709	-0.02071	49	Hannum et al., 2013
GSE40279	GSM989968	-0.05398	-0.02651	48	Hannum et al., 2013
GSE40279	GSM989975	-0.14995	-0.0427	47	Hannum et al., 2013
GSE40279	GSM989976	-0.06201	-0.04146	43	Hannum et al., 2013
GSE40279	GSM989980	-0.06636	-0.04481	34	Hannum et al., 2013
GSE40279	GSM989983	-0.18178	-0.05531	32	Hannum et al., 2013
GSE40279	GSM989984	-0.11134	-0.04078	47	Hannum et al., 2013
GSE40279	GSM989987	-0.09051	-0.04034	28	Hannum et al., 2013
GSE40279	GSM989992	-0.08079	-0.02097	30	Hannum et al., 2013
GSE40279	GSM989994	-0.12708	-0.04039	47	Hannum et al., 2013
GSE40279	GSM989995	-0.07998	-0.02874	47	Hannum et al., 2013
GSE40279	GSM989996	-0.15641	-0.03981	33	Hannum et al., 2013
GSE40279	GSM989997	-0.13275	-0.0383	38	Hannum et al., 2013
GSE40279	GSM989998	-0.16438	-0.01597	35	Hannum et al., 2013
GSE40279	GSM989999	-0.12131	-0.04853	47	Hannum et al., 2013
GSE40279	GSM990070	-0.12803	-0.02094	48	Hannum et al., 2013
GSE40279	GSM990071	-0.12262	-0.01745	44	Hannum et al., 2013
GSE40279	GSM990072	-0.15927	-0.0488	48	Hannum et al., 2013
GSE40279	GSM990075	-0.11863	-0.04973	46	Hannum et al., 2013
GSE40279	GSM990077	-0.14275	-0.03999	40	Hannum et al., 2013
GSE40279	GSM990078	-0.12979	-0.04888	43	Hannum et al., 2013
GSE40279	GSM990079	-0.15206	-0.01586	41	Hannum et al., 2013
GSE40279	GSM990081	-0.11037	-0.04525	48	Hannum et al., 2013
GSE40279	GSM990085	-0.14803	-0.01713	48	Hannum et al., 2013
GSE40279	GSM990088	-0.12854	-0.03292	46	Hannum et al., 2013
GSE40279	GSM990091	-0.13104	-0.04306	45	Hannum et al., 2013
GSE40279	GSM990097	-0.17237	-0.01591	38	Hannum et al., 2013
GSE40279	GSM990098	-0.13852	-0.04198	42	Hannum et al., 2013
GSE40279	GSM990101	-0.15319	-0.04024	43	Hannum et al., 2013
GSE40279	GSM990102	-0.08239	-0.03243	38	Hannum et al., 2013
GSE40279	GSM990105	-0.12801	-0.04301	44	Hannum et al., 2013
GSE40279	GSM990108	-0.12789	-0.02352	41	Hannum et al., 2013
GSE40279	GSM990115	-0.17156	-0.04196	38	Hannum et al., 2013
GSE40279	GSM990120	-0.14665	-0.02225	49	Hannum et al., 2013
GSE40279	GSM990269	-0.12817	-0.04645	43	Hannum et al., 2013
GSE40279	GSM990270	-0.15792	-0.0498	49	Hannum et al., 2013
GSE40279	GSM990277	-0.10871	-0.03913	33	Hannum et al., 2013
GSE40279	GSM990278	-0.12007	-0.04999	46	Hannum et al., 2013
GSE40279	GSM990279	-0.10712	-0.0255	46	Hannum et al., 2013
GSE40279	GSM990283	-0.10655	-0.04397	46	Hannum et al., 2013
GSE40279	GSM990285	-0.07523	-0.04679	47	Hannum et al., 2013
GSE40279	GSM990288	-0.16488	-0.04501	48	Hannum et al., 2013
GSE40279	GSM990289	-0.16801	-0.02136	45	Hannum et al., 2013
GSE40279	GSM990292	-0.15362	-0.0402	34	Hannum et al., 2013
GSE40279	GSM990295	-0.12793	-0.02121	48	Hannum et al., 2013
GSE40279	GSM990299	-0.12178	-0.04392	37	Hannum et al., 2013
GSE40279	GSM990309	-0.16949	-0.02241	44	Hannum et al., 2013
GSE40279	GSM990323	-0.16731	-0.04926	46	Hannum et al., 2013
GSE40279	GSM990324	-0.14708	-0.04796	31	Hannum et al., 2013
GSE40279	GSM990327	-0.13565	-0.03157	42	Hannum et al., 2013
GSE40279	GSM990331	-0.14651	-0.04149	45	Hannum et al., 2013
GSE40279	GSM990346	-0.17363	-0.02442	44	Hannum et al., 2013
GSE40279	GSM990349	-0.10768	-0.051	48	Hannum et al., 2013
GSE40279	GSM990350	-0.10077	-0.00858	46	Hannum et al., 2013
GSE40279	GSM990351	-0.13361	-0.02408	41	Hannum et al., 2013
GSE40279	GSM990355	-0.10069	-0.03824	45	Hannum et al., 2013
GSE40279	GSM990367	-0.17384	-0.04777	40	Hannum et al., 2013
GSE40279	GSM990369	-0.18221	-0.01631	38	Hannum et al., 2013
GSE40279	GSM990373	-0.17789	-0.0399	41	Hannum et al., 2013
GSE40279	GSM990375	-0.11377	-0.01868	26	Hannum et al., 2013
GSE40279	GSM990391	-0.13873	-0.0537	43	Hannum et al., 2013
GSE40279	GSM990393	-0.13781	-0.04756	47	Hannum et al., 2013
GSE40279	GSM990395	-0.15356	-0.04443	46	Hannum et al., 2013
GSE40279	GSM990433	-0.14692	-0.04848	49	Hannum et al., 2013
GSE40279	GSM990450	-0.09091	-0.04562	48	Hannum et al., 2013
GSE40279	GSM990472	-0.16627	-0.02111	48	Hannum et al., 2013
GSE40279	GSM990476	-0.14151	0.00536	41	Hannum et al., 2013
GSE40279	GSM990479	-0.14043	-0.0249	45	Hannum et al., 2013
GSE40279	GSM990483	-0.17535	-0.01741	45	Hannum et al., 2013
GSE40279	GSM990490	-0.11719	-0.00592	33	Hannum et al., 2013
GSE40279	GSM990499	-0.11246	-0.05074	27	Hannum et al., 2013
GSE40279	GSM990500	-0.11279	-0.04429	29	Hannum et al., 2013
GSE40279	GSM990501	-0.1623	-0.05721	44	Hannum et al., 2013
GSE40279	GSM990502	-0.13916	-0.01201	41	Hannum et al., 2013
GSE40279	GSM990503	-0.14331	-0.02826	45	Hannum et al., 2013
GSE40279	GSM990504	-0.12503	-0.01562	27	Hannum et al., 2013
GSE40279	GSM990505	-0.10788	-0.05062	48	Hannum et al., 2013
GSE40279	GSM990507	-0.14442	-0.039	34	Hannum et al., 2013
GSE40279	GSM990510	-0.1336	-0.0439	47	Hannum et al., 2013
GSE40279	GSM990515	-0.13852	-0.03963	47	Hannum et al., 2013
GSE40279	GSM990517	-0.14029	-0.04289	32	Hannum et al., 2013
GSE40279	GSM990518	-0.116	-0.04146	23	Hannum et al., 2013
GSE40279	GSM990519	-0.15069	-0.01858	43	Hannum et al., 2013
GSE40279	GSM990520	-0.16998	-0.01433	47	Hannum et al., 2013
GSE40279	GSM990521	-0.15015	-0.04579	44	Hannum et al., 2013
GSE40279	GSM990522	-0.16417	-0.03408	37	Hannum et al., 2013
GSE40279	GSM990523	-0.12078	-0.03024	27	Hannum et al., 2013
GSE40279	GSM990525	-0.16468	-0.03722	28	Hannum et al., 2013
GSE40279	GSM990528	-0.14373	-0.01326	19	Hannum et al., 2013
GSE40279	GSM990529	-0.17706	-0.05026	44	Hannum et al., 2013
GSE40279	GSM990530	-0.14317	-0.04658	49	Hannum et al., 2013
GSE40279	GSM990531	-0.09783	-0.00768	34	Hannum et al., 2013
GSE40279	GSM990532	-0.14751	-0.04276	44	Hannum et al., 2013
GSE40279	GSM990534	-0.12015	-0.04082	30	Hannum et al., 2013
GSE40279	GSM990535	-0.12682	-0.01939	49	Hannum et al., 2013
GSE40279	GSM990536	-0.07227	-0.02316	36	Hannum et al., 2013
GSE40279	GSM990537	-0.16414	-0.01375	25	Hannum et al., 2013
GSE40279	GSM990538	-0.18125	-0.02183	36	Hannum et al., 2013
GSE40279	GSM990539	-0.17321	-0.04327	21	Hannum et al., 2013
GSE40279	GSM990540	-0.08376	-0.01765	40	Hannum et al., 2013
GSE40279	GSM990541	-0.15991	-0.04047	22	Hannum et al., 2013
GSE40279	GSM990542	-0.14354	-0.0195	36	Hannum et al., 2013

## Sheet: Supp. Table 6
Supplementary Table 6. List of significant (q < 0.05, |Δβ| ≥ 5%) sites in 16p11.2del DNAm signature.
Illumina ID	Benjamini Hochberg corrected pvalue (q-value)	Δβ	|Δβ|	DNAm effect (Gain or loss of methylation)	Gene Symbol	Genome Build	Chromosome	Genomic Coordinate hg19	Strand	Relation to UCSC CpG Island	Regulatory Feature Group
cg03144232	0.00342389	-0.0849597	0.0849597	Loss	STX1B	37	16	31022351	R		Unclassified_Cell_type_specific
cg15457981	0.00342389	0.113548	0.113548	Gain	COL9A3	37	20	61447276	F	N_Shore	Unclassified_Cell_type_specific
cg00137234	0.00410867	-0.127272	0.127272	Loss	RBM46	37	4	155703138	R	Island
cg02071292	0.00410867	0.182525	0.182525	Gain	GLIPR1L2	37	12	75785097	R	Island	Promoter_Associated
cg25970491	0.00410867	-0.11264	0.11264	Loss	CLTCL1;CLTCL1	37	22	19279922	F	S_Shore	Promoter_Associated
cg06593603	0.0046467	0.130391	0.130391	Gain	SLC6A19	37	5	1218042	F	N_Shore	Unclassified_Cell_type_specific
cg16519192	0.0046467	0.114677	0.114677	Gain		37	12	116037126	F
cg03335125	0.00513584	-0.109945	0.109945	Loss	CCDC17	37	1	46088541	R	Island
cg06687305	0.00513584	-0.101062	0.101062	Loss	CCDC17	37	1	46088486	R	Island
cg05630111	0.00592596	-0.135369	0.135369	Loss	LASS2;LASS2	37	1	150948030	R	S_Shore
cg25006249	0.00592596	0.162017	0.162017	Gain	C20orf96	37	20	259898	R	Island	Unclassified_Cell_type_specific
cg26450860	0.00592596	-0.0917752	0.0917752	Loss		37	12	125413164	F	Island	Promoter_Associated
cg01927921	0.00674708	-0.114974	0.114974	Loss		37	5	3787906	R
cg02415057	0.00674708	0.172614	0.172614	Gain	GLIPR1L2	37	12	75784884	R	Island	Promoter_Associated
cg02707799	0.00674708	0.0961035	0.0961035	Gain	MYST3;MYST3;MYST3	37	8	41814854	F		Promoter_Associated
cg05295388	0.00674708	-0.10005	0.10005	Loss		37	2	118594304	R	S_Shore	Unclassified_Cell_type_specific
cg08801479	0.00790756	-0.0935368	0.0935368	Loss	NOTCH4	37	6	32165200	R	S_Shore
cg09615056	0.00790756	0.113268	0.113268	Gain	C16orf91	37	16	1478718	F	Island	Unclassified_Cell_type_specific
cg17519938	0.00790756	-0.142797	0.142797	Loss	LRRC47	37	1	3713580	R	S_Shore	Promoter_Associated
cg07788167	0.00874994	-0.0885703	0.0885703	Loss		37	7	57484272	F	Island
cg12351126	0.00874994	0.171993	0.171993	Gain	GLIPR1L2	37	12	75784864	R	Island	Promoter_Associated
cg13159946	0.00874994	-0.104234	0.104234	Loss	NCRNA00028	37	20	30073521	F	S_Shore
cg16419724	0.00874994	-0.0969032	0.0969032	Loss	MARVELD2;MARVELD2	37	5	68711519	F	Island	Unclassified_Cell_type_specific
cg21867110	0.00874994	-0.102859	0.102859	Loss		37	19	22700397	R	Island
cg23588049	0.00874994	0.13202	0.13202	Gain	GLIPR1L2	37	12	75784862	R	Island	Promoter_Associated
cg02327189	0.0102717	-0.0989664	0.0989664	Loss		37	7	57830004	R
cg02991085	0.0102717	-0.164468	0.164468	Loss	NCRNA00028	37	20	30073537	F	S_Shore
cg06524264	0.0102717	0.156005	0.156005	Gain	C20orf96	37	20	259925	R	Island	Unclassified_Cell_type_specific
cg07311024	0.0102717	0.142531	0.142531	Gain	GLIPR1L2	37	12	75785089	R	Island	Promoter_Associated
cg13349472	0.0102717	-0.0834947	0.0834947	Loss		37	2	25427451	R	Island	Unclassified_Cell_type_specific
cg01447828	0.011065	0.0812449	0.0812449	Gain	PRX;PRX	37	19	40919465	R
cg01601573	0.011065	-0.111788	0.111788	Loss	GAB1;GAB1	37	4	144256835	R	N_Shore
cg14220678	0.011065	-0.137228	0.137228	Loss	CCDC17	37	1	46089024	F	Island
cg17050806	0.011065	0.200584	0.200584	Gain	GLIPR1L2	37	12	75785295	F	S_Shore	Promoter_Associated
cg17780447	0.011065	-0.0916441	0.0916441	Loss		37	19	22700869	R	Island
cg19961173	0.011065	0.100543	0.100543	Gain	IGSF9B	37	11	133788902	F	Island	Unclassified_Cell_type_specific
cg25283121	0.011065	0.10781	0.10781	Gain	GALNT9	37	12	132904540	F	N_Shore	Unclassified_Cell_type_specific
cg25683185	0.011065	-0.0912026	0.0912026	Loss	ACRBP	37	12	6756088	R	Island	Unclassified_Cell_type_specific
cg00108944	0.0133606	0.124957	0.124957	Gain	GLIPR1L2	37	12	75784855	R	Island	Promoter_Associated
cg07670516	0.0133606	-0.126702	0.126702	Loss	ZNF232	37	17	5019840	R	Island
cg08111158	0.0133606	-0.101891	0.101891	Loss		37	1	227746191	F	Island
cg13073141	0.0133606	-0.0938661	0.0938661	Loss	LASS2;LASS2	37	1	150948024	R	S_Shore
cg13112404	0.0133606	-0.0950507	0.0950507	Loss	C1orf14	37	1	182921688	R	N_Shore
cg00524967	0.0152807	-0.0917367	0.0917367	Loss	RFC3;RFC3	37	13	34391826	F	N_Shore	Promoter_Associated
cg00639615	0.0152807	-0.108313	0.108313	Loss	FANCI;FANCI	37	15	89786496	F	N_Shore	Promoter_Associated
cg04444104	0.0152807	0.120429	0.120429	Gain		37	16	89059436	F		Unclassified_Cell_type_specific
cg16290689	0.0152807	-0.115548	0.115548	Loss	C13orf26	37	13	31506685	R
cg18174881	0.0152807	-0.128625	0.128625	Loss	C14orf106	37	14	45723353	F	S_Shore	Promoter_Associated
cg20462561	0.0152807	-0.137173	0.137173	Loss		37	1	228890820	R	Island
cg21272279	0.0152807	0.180672	0.180672	Gain	GLIPR1L2	37	12	75785232	F	Island	Promoter_Associated
cg22012583	0.0152807	-0.0907064	0.0907064	Loss	LASS2;LASS2	37	1	150947949	F	Island
cg01786973	0.0188609	-0.111117	0.111117	Loss	NR5A1	37	9	127249749	F	Island
cg06324373	0.0188609	0.181171	0.181171	Gain	CRTAC1	37	10	99734805	R
cg12154538	0.0188609	0.155316	0.155316	Gain	NCOR2;NCOR2	37	12	124873673	R	Island	Unclassified_Cell_type_specific
cg14880348	0.0188609	0.137518	0.137518	Gain	COL9A3	37	20	61447174	F	N_Shore	Unclassified_Cell_type_specific
cg01781662	0.0217884	-0.0964253	0.0964253	Loss	METTL11A	37	9	132387805	F	N_Shore
cg01901788	0.0217884	-0.0895734	0.0895734	Loss	MAP1LC3A;MAP1LC3A	37	20	33145848	R	N_Shore	Promoter_Associated
cg06377543	0.0217884	-0.0886435	0.0886435	Loss	PSMA8;PSMA8;PSMA8	37	18	23713657	F	N_Shore
cg08137948	0.0217884	-0.0972435	0.0972435	Loss	LGALS8;LGALS8;LGALS8;LGALS8;LGALS8;LGALS8	37	1	236686804	R	N_Shore	Promoter_Associated
cg14354168	0.0217884	-0.104192	0.104192	Loss		37	6	1619134	R	Island
cg17270081	0.0217884	0.100119	0.100119	Gain	LHX3;LHX3	37	9	139092974	R	Island
cg18842474	0.0217884	0.226719	0.226719	Gain	SLC22A23;SLC22A23	37	6	3356384	F		Unclassified
cg24675557	0.0217884	-0.0912808	0.0912808	Loss	BLCAP;BLCAP;BLCAP;BLCAP;NNAT;NNAT;BLCAP	37	20	36149081	F	Island
cg03642635	0.0267063	0.130039	0.130039	Gain	IGSF9B	37	11	133788233	R	Island	Unclassified_Cell_type_specific
cg09334514	0.0267063	-0.0920824	0.0920824	Loss	LGALS8;LGALS8;LGALS8;LGALS8	37	1	236686671	F	N_Shore
cg10313047	0.0267063	-0.109934	0.109934	Loss	DNAH1	37	3	52351355	R		Unclassified_Cell_type_specific
cg00424169	0.0275327	-0.101383	0.101383	Loss	C13orf26;C13orf26	37	13	31506837	F
cg00404187	0.030173	-0.0900281	0.0900281	Loss		37	7	140135611	F	Island
cg06067394	0.030173	0.104551	0.104551	Gain	IGSF9B	37	11	133789110	F	Island
cg13614409	0.030173	-0.211151	0.211151	Loss	C13orf26	37	13	31506752	F
cg23504719	0.030173	0.120554	0.120554	Gain	CRTAC1	37	10	99735010	R
cg25502144	0.030173	-0.125717	0.125717	Loss	NCRNA00028	37	20	30073546	F	S_Shore
cg00237268	0.0318211	-0.0947692	0.0947692	Loss	SORCS2	37	4	7287615	R
cg03995300	0.0318211	-0.127469	0.127469	Loss	ZNF232	37	17	5019989	F	S_Shore
cg06178322	0.0318211	-0.0826826	0.0826826	Loss	PLEKHM2	37	1	16010345	R	N_Shore
cg08620329	0.0318211	-0.199348	0.199348	Loss		37	8	67454546	F	Island
cg08942800	0.0318211	-0.108972	0.108972	Loss	CRISP2;CRISP2;CRISP2;CRISP2;CRISP2	37	6	49681310	F
cg12109823	0.0318211	-0.187008	0.187008	Loss		37	8	67454595	F	Island
cg13474370	0.0318211	-0.0977786	0.0977786	Loss	RBPMS2	37	15	65068885	R	S_Shore
cg14435498	0.0318211	0.0846485	0.0846485	Gain		37	10	133251574	R
cg23926439	0.0318211	-0.112184	0.112184	Loss		37	1	228890884	R	Island
cg02763002	0.0363154	-0.0782317	0.0782317	Loss	GLT1D1	37	12	129444671	F
cg04202002	0.0363154	-0.0846907	0.0846907	Loss		37	2	127643360	R	N_Shore
cg10831725	0.0363154	-0.111006	0.111006	Loss		37	19	21666552	R	Island
cg18793215	0.0363154	-0.0800054	0.0800054	Loss	CRABP2	37	1	156674685	R	N_Shore
cg21248196	0.0363154	-0.0980662	0.0980662	Loss	PSMA8;PSMA8;PSMA8	37	18	23714084	R	S_Shore	Unclassified_Cell_type_specific
cg25983544	0.0363154	-0.0857219	0.0857219	Loss	PSMA8;PSMA8;PSMA8	37	18	23713626	R	N_Shore
cg02596089	0.0402098	-0.0867397	0.0867397	Loss	CCDC9	37	19	47759400	F	N_Shore	Promoter_Associated
cg03168497	0.0402098	-0.211444	0.211444	Loss	MYCBPAP	37	17	48586147	R	Island	Promoter_Associated_Cell_type_specific
cg04471507	0.0402098	-0.082483	0.082483	Loss	STMN1;STMN1;STMN1;STMN1	37	1	26233376	F	Island
cg12134633	0.0402098	-0.132573	0.132573	Loss	SCG5;SCG5	37	15	32934004	R
cg23107878	0.0402098	-0.177452	0.177452	Loss		37	1	152161397	F	Island	Unclassified
cg25323057	0.0402098	-0.108567	0.108567	Loss	C10orf116;AGAP11	37	10	88730481	F	N_Shore	Promoter_Associated
cg25716013	0.0402098	-0.154541	0.154541	Loss	COX7A2;COX7A2	37	6	75954053	R		Promoter_Associated
cg08316083	0.0430483	0.143277	0.143277	Gain	ATP8B3	37	19	1796207	R	Island	Unclassified
cg09577391	0.0430483	-0.131263	0.131263	Loss	ZNF606	37	19	58515046	R	S_Shore
cg10923408	0.0430483	-0.115545	0.115545	Loss	C13orf26	37	13	31506710	F
cg11296498	0.0430483	0.0858012	0.0858012	Gain	COL9A3	37	20	61447036	F	N_Shore
cg12535715	0.0430483	-0.0898586	0.0898586	Loss	HTRA4;HTRA4	37	8	38831693	R	Island
cg15537254	0.0430483	-0.0887959	0.0887959	Loss	NCRNA00028	37	20	30073399	R	S_Shore
cg16865965	0.0430483	0.183687	0.183687	Gain	VAMP5	37	2	85811662	R	Island
cg19873923	0.0430483	0.11153	0.11153	Gain	TC2N;TC2N;TC2N	37	14	92301922	R	N_Shore	Unclassified
cg20454518	0.0430483	0.100274	0.100274	Gain	FBRSL1	37	12	133135463	F	Island	Unclassified_Cell_type_specific
cg21846177	0.0430483	-0.093674	0.093674	Loss	NCRNA00028	37	20	30073576	F	S_Shore
cg24975642	0.0430483	0.121617	0.121617	Gain	NCOR2;NCOR2	37	12	124873347	F	Island	Unclassified_Cell_type_specific
cg26349358	0.0430483	-0.0843294	0.0843294	Loss		37	2	468989	F	S_Shore
cg03606898	0.0479345	-0.0851609	0.0851609	Loss		37	19	2926882	R	Island
cg03755566	0.0479345	-0.100808	0.100808	Loss	ACTA2;ACTA2	37	10	90695563	F		Unclassified
cg04844038	0.0479345	0.110869	0.110869	Gain	SORCS1;SORCS1	37	10	108921320	R	N_Shelf
cg09071762	0.0479345	-0.0974063	0.0974063	Loss	DPPA5	37	6	74064149	F	Island
cg09491536	0.0479345	-0.0849662	0.0849662	Loss		37	5	3787915	F
cg11108890	0.0479345	0.0979471	0.0979471	Gain	VAMP5	37	2	85811471	R	Island	Promoter_Associated
cg11491537	0.0479345	-0.107826	0.107826	Loss	C2orf27A	37	2	132511720	F
cg16719560	0.0479345	0.0978605	0.0978605	Gain	VAMP5	37	2	85811421	F	Island	Promoter_Associated
cg25651505	0.0479345	0.0864054	0.0864054	Gain	VAMP5	37	2	85812023	F	S_Shore

## Sheet: Supp. Table 7
Supplementary Table 7. List of significant (q < 0.05, |Δβ| ≥ 5%) sites in CHD8+/- DNAm signature.
Illumina ID	Benjamini Hochberg corrected pvalue (q-value)	Δβ	|Δβ|	DNAm effect (Gain or loss of methylation)	Gene Symbol	Genome Build	Chromosome	Genomic Coordinate hg19	Strand	Relation to UCSC CpG Island	Regulatory Feature Group
cg00806311	0.00400196	-0.0997928	0.0997928	Loss	C1orf101;C1orf101	37	1	244625112	F	S_Shore	Promoter_Associated	DNAm signatures used for classification of test cases (sequence variants).	DNAm signature used for downstream biological and functional analyses.
cg00913360	0.00400196	-0.0547547	0.0547547	Loss		37	7	151594392	R
cg01252496	0.00400196	-0.0562787	0.0562787	Loss	USE1	37	19	17326655	R	S_Shore	Promoter_Associated
cg01477861	0.00400196	-0.118961	0.118961	Loss	SHROOM3	37	4	77609841	R	N_Shore
cg01963623	0.00400196	-0.168326	0.168326	Loss	USP18	37	22	18632433	R	N_Shore	Promoter_Associated
cg02674474	0.00400196	-0.101554	0.101554	Loss	PAK7;PAK7	37	20	9818397	R	N_Shore
cg03315230	0.00400196	-0.0942976	0.0942976	Loss	ABHD1	37	2	27346938	R	S_Shore
cg04089788	0.00400196	-0.12702	0.12702	Loss	PLXNB2	37	22	50738890	F	Island
cg04840702	0.00400196	-0.0657529	0.0657529	Loss		37	4	174422626	R	S_Shore	Unclassified_Cell_type_specific
cg05846166	0.00400196	-0.0619338	0.0619338	Loss	PRSS27	37	16	2770814	F	N_Shore	Promoter_Associated
cg06161930	0.00400196	-0.074321	0.074321	Loss	ZNF787	37	19	56633191	R	S_Shore
cg06615754	0.00400196	-0.12957	0.12957	Loss	ZNF551	37	19	58193071	F	N_Shore	Unclassified
cg06648759	0.00400196	-0.0806544	0.0806544	Loss		37	13	40892751	R
cg08463024	0.00400196	0.0821299	0.0821299	Gain	BAT1;BAT1	37	6	31508167	F	N_Shore
cg09169617	0.00400196	-0.0633883	0.0633883	Loss	LOC254559	37	15	89921672	R	Island
cg09454892	0.00400196	0.155474	0.155474	Gain	SAMD8	37	10	76870850	F	N_Shore
cg10636297	0.00400196	-0.0711559	0.0711559	Loss	AGPAT3;AGPAT3	37	21	45405724	F	S_Shelf	Unclassified_Cell_type_specific
cg11917542	0.00400196	-0.0854661	0.0854661	Loss	ZBTB22;TAPBP;TAPBP;TAPBP;ZBTB22	37	6	33283158	R	Island
cg12406027	0.00400196	0.0812907	0.0812907	Gain	PAK4;PAK4;PAK4;PAK4;PAK4	37	19	39616818	F	Island
cg12439325	0.00400196	-0.100071	0.100071	Loss	TMPRSS12	37	12	51236768	F	Island
cg12718440	0.00400196	-0.13244	0.13244	Loss	MORN4;MORN4	37	10	99393576	F	S_Shore	Promoter_Associated
cg13028113	0.00400196	-0.100153	0.100153	Loss	C5orf43	37	5	60458778	R	S_Shore
cg15475323	0.00400196	-0.0755502	0.0755502	Loss	MAMSTR;MAMSTR;MAMSTR	37	19	49220102	R	N_Shelf	Unclassified_Cell_type_specific
cg20092736	0.00400196	-0.107546	0.107546	Loss		37	11	67982703	F	S_Shore	Unclassified_Cell_type_specific
cg21747160	0.00400196	-0.102565	0.102565	Loss	LMBR1L	37	12	49504981	R	S_Shore	Promoter_Associated
cg22445712	0.00400196	-0.163421	0.163421	Loss	PLXNB2	37	22	50738550	F	Island
cg22670819	0.00400196	-0.116738	0.116738	Loss	CFB;CFB	37	6	31913759	R
cg23525596	0.00400196	-0.064453	0.064453	Loss	CACNA2D2;CACNA2D2	37	3	50403287	R	S_Shore	Promoter_Associated
cg24950222	0.00400196	-0.0565133	0.0565133	Loss	LYPD3	37	19	43969886	F	S_Shore
cg25612391	0.00400196	-0.159523	0.159523	Loss	SLC25A42	37	19	19216451	R
cg25821785	0.00400196	-0.0867526	0.0867526	Loss	CACNA2D2;CACNA2D2	37	3	50403130	R	S_Shore	Promoter_Associated
cg25937577	0.00400196	-0.111275	0.111275	Loss	PLA2G3	37	22	31536476	R		Unclassified
cg27206976	0.00400196	-0.134889	0.134889	Loss	PLXNB2	37	22	50738315	R	Island	Unclassified_Cell_type_specific
cg27295642	0.00400196	-0.121707	0.121707	Loss		37	5	74952444	R
cg27364650	0.00400196	-0.0904731	0.0904731	Loss		37	3	43899898	F
cg27478579	0.00400196	-0.0733012	0.0733012	Loss	MTIF2;MTIF2	37	2	55497012	F	S_Shore	Promoter_Associated
cg27584762	0.00400196	-0.1025	0.1025	Loss	CCNH	37	5	86709126	F	S_Shore	Promoter_Associated
cg03079640	0.00548417	-0.0827427	0.0827427	Loss	LOC388796;LOC388796	37	20	37064274	F	S_Shore	Promoter_Associated
cg03162823	0.00548417	-0.13988	0.13988	Loss	USP44;USP44	37	12	95941571	R	N_Shore	Promoter_Associated_Cell_type_specific
cg04661001	0.00548417	-0.118371	0.118371	Loss	SLC25A42	37	19	19217217	R	N_Shelf
cg05815196	0.00548417	-0.0601516	0.0601516	Loss	PLA2G3	37	22	31536540	R		Unclassified
cg07129669	0.00548417	-0.0622224	0.0622224	Loss	CACNA2D2;CACNA2D2	37	3	50403227	F	S_Shore	Promoter_Associated
cg10088460	0.00548417	-0.0864977	0.0864977	Loss		37	16	34375288	F
cg10989517	0.00548417	-0.102587	0.102587	Loss	SERGEF	37	11	18034024	R	N_Shore
cg12106855	0.00548417	-0.102469	0.102469	Loss	OXR1	37	8	107281510	R	N_Shore	Unclassified_Cell_type_specific
cg13905238	0.00548417	-0.0600021	0.0600021	Loss		37	3	197155273	F
cg14328676	0.00548417	-0.141902	0.141902	Loss	SULT2B1;SULT2B1	37	19	49077983	F		Unclassified_Cell_type_specific
cg14686645	0.00548417	-0.120819	0.120819	Loss	ITGA2B	37	17	42452426	F
cg17382939	0.00548417	-0.103154	0.103154	Loss	RAD9B;VPS29;VPS29	37	12	110940444	F	S_Shore	Promoter_Associated
cg18699242	0.00548417	-0.175762	0.175762	Loss	USP18	37	22	18632429	R	N_Shore	Promoter_Associated
cg21760990	0.00548417	-0.0955406	0.0955406	Loss	C6orf170	37	6	121656542	F	S_Shore	Promoter_Associated
cg22946066	0.00548417	-0.0910546	0.0910546	Loss	TRMT11	37	6	126308385	F	S_Shore	Promoter_Associated
cg25881170	0.00548417	-0.110171	0.110171	Loss	CD47;CD47;CD47	37	3	107810507	R	Island
cg26688574	0.00548417	-0.0690057	0.0690057	Loss	CDK5RAP1;CDK5RAP1	37	20	31989989	F	S_Shore	Promoter_Associated
cg00381684	0.00789721	-0.100828	0.100828	Loss	CFB;CFB	37	6	31913814	F
cg00536792	0.00789721	-0.0603503	0.0603503	Loss	KLHL31;KLHL31	37	6	53530503	F
cg00951302	0.00789721	-0.0920916	0.0920916	Loss		37	6	166131985	F
cg01140985	0.00789721	-0.0996397	0.0996397	Loss	AP1G1;AP1G1	37	16	71843559	R	S_Shore	Promoter_Associated
cg01757168	0.00789721	-0.11379	0.11379	Loss		37	3	128215565	R	Island
cg03680291	0.00789721	0.0731807	0.0731807	Gain		37	16	47052148	F	S_Shelf	Unclassified
cg03710889	0.00789721	-0.0983132	0.0983132	Loss	SLC11A1	37	2	219252818	R	S_Shore
cg07421596	0.00789721	-0.0824533	0.0824533	Loss	CFB;CFB	37	6	31913770	R
cg07520269	0.00789721	-0.116836	0.116836	Loss	DLG2;DLG2;DLG2	37	11	84634188	F
cg08118344	0.00789721	-0.0731845	0.0731845	Loss	RAP1GAP;RAP1GAP;RAP1GAP	37	1	21974525	R	N_Shelf
cg08771019	0.00789721	-0.119815	0.119815	Loss	ZBTB22;TAPBP;TAPBP;TAPBP;ZBTB22	37	6	33283145	R	Island
cg10134527	0.00789721	-0.110499	0.110499	Loss	ZBTB22;TAPBP;TAPBP;TAPBP;ZBTB22	37	6	33283015	F	Island
cg13699479	0.00789721	-0.0626999	0.0626999	Loss		37	11	67982598	R	S_Shore	Unclassified_Cell_type_specific
cg14322224	0.00789721	-0.0599046	0.0599046	Loss	DDAH1;DDAH1	37	1	85931226	R	S_Shore
cg21105955	0.00789721	-0.11255	0.11255	Loss	MDC1	37	6	30684478	R	N_Shore
cg23120942	0.00789721	-0.0595958	0.0595958	Loss	BCAS3;BCAS3	37	17	58755752	F	S_Shore	Promoter_Associated
cg24181914	0.00789721	-0.128885	0.128885	Loss	ZC3H4	37	19	47617301	R	S_Shore
cg24657523	0.00789721	-0.108586	0.108586	Loss	MYEF2	37	15	48470754	F	S_Shore	Promoter_Associated
cg26005232	0.00789721	-0.0961404	0.0961404	Loss	NUDC	37	1	27247829	R	N_Shore	Promoter_Associated
cg27165794	0.00789721	0.0842289	0.0842289	Gain	PNMA1	37	14	74179674	R	N_Shore	Promoter_Associated
cg00039057	0.00977839	-0.061421	0.061421	Loss	UCRC;UCRC;ZMAT5;ZMAT5	37	22	30162510	F	N_Shore	Promoter_Associated
cg00278366	0.00977839	-0.0780129	0.0780129	Loss	RAD9B;VPS29;VPS29	37	12	110940287	R	S_Shore	Promoter_Associated
cg00492070	0.00977839	-0.0858729	0.0858729	Loss	CD47;CD47;CD47	37	3	107810716	F	S_Shore
cg01020079	0.00977839	-0.0831653	0.0831653	Loss	TMPRSS12;TMPRSS12	37	12	51236704	F	Island
cg03917138	0.00977839	-0.124323	0.124323	Loss	SOX9	37	17	70120182	F	Island
cg04548815	0.00977839	-0.0565945	0.0565945	Loss	VANGL1	37	1	116184387	R	Island
cg05867134	0.00977839	-0.0525315	0.0525315	Loss	STX1B	37	16	31009035	F	Island	Promoter_Associated
cg05970811	0.00977839	-0.0946257	0.0946257	Loss	SRGAP1	37	12	64237202	F	N_Shore	Promoter_Associated
cg06634460	0.00977839	-0.112364	0.112364	Loss	VPS37B	37	12	123380891	R	Island	Promoter_Associated
cg07245868	0.00977839	-0.095448	0.095448	Loss	ZBTB22;TAPBP;TAPBP;TAPBP;ZBTB22	37	6	33283055	R	Island
cg09238801	0.00977839	0.073297	0.073297	Gain	PNMA1;PNMA1	37	14	74179101	R	N_Shore	Promoter_Associated
cg09819656	0.00977839	0.152332	0.152332	Gain	NPAS3;NPAS3;NPAS3;NPAS3	37	14	34270090	F	Island
cg10376053	0.00977839	-0.105654	0.105654	Loss	ZBTB22;TAPBP;TAPBP;TAPBP;ZBTB22	37	6	33282867	R	Island
cg11267669	0.00977839	-0.0838877	0.0838877	Loss	PLEKHH2;LOC728819	37	2	43903524	R
cg11741004	0.00977839	-0.0946716	0.0946716	Loss	CD47;CD47;CD47	37	3	107810678	F	S_Shore
cg12324629	0.00977839	-0.0719895	0.0719895	Loss	ULK2;ULK2	37	17	19771548	F	N_Shore
cg12748890	0.00977839	-0.144979	0.144979	Loss	SYTL1	37	1	27676205	F	Island	Gene_Associated_Cell_type_specific
cg13560436	0.00977839	-0.0820675	0.0820675	Loss	MIER3	37	5	56248587	F	S_Shore
cg14288848	0.00977839	-0.128824	0.128824	Loss	ZBTB22;TAPBP;TAPBP;TAPBP;ZBTB22	37	6	33282873	R	Island
cg14845962	0.00977839	-0.105316	0.105316	Loss	AGAP2;LOC100130776;AGAP2	37	12	58120237	R	Island	Unclassified
cg15660077	0.00977839	-0.0639998	0.0639998	Loss	NLGN2	37	17	7311620	R	N_Shore	Unclassified_Cell_type_specific
cg17192377	0.00977839	-0.0643488	0.0643488	Loss	HDHD2	37	18	44677553	R	S_Shore
cg19602315	0.00977839	-0.10054	0.10054	Loss	C17orf75	37	17	30669494	F	S_Shore	Promoter_Associated
cg20457147	0.00977839	-0.0995303	0.0995303	Loss	PRKCH	37	14	61787823	R	N_Shore	Promoter_Associated
cg21408915	0.00977839	-0.0793299	0.0793299	Loss		37	11	69286231	R	Island
cg23919433	0.00977839	-0.0699682	0.0699682	Loss	ARHGDIA	37	17	79830196	F	S_Shore
cg24631162	0.00977839	0.0795653	0.0795653	Gain	BAT1;BAT1	37	6	31508318	R	N_Shore
cg26646118	0.00977839	-0.0941364	0.0941364	Loss	ZBTB22;TAPBP;TAPBP;TAPBP;ZBTB22	37	6	33283000	F	Island
cg27416261	0.00977839	-0.0879362	0.0879362	Loss	LOC158381;LOC158381	37	9	35406590	R
cg01834979	0.0130652	-0.117752	0.117752	Loss	AGAP2;LOC100130776;AGAP2	37	12	58119918	F	Island	Unclassified
cg03000593	0.0130652	-0.075207	0.075207	Loss	ZBTB22;TAPBP;TAPBP;TAPBP;ZBTB22	37	6	33283162	R	Island
cg03433986	0.0130652	-0.087389	0.087389	Loss	BSCL2	37	11	62477624	F	S_Shore	Promoter_Associated
cg03453449	0.0130652	-0.143206	0.143206	Loss	USP44;USP44	37	12	95945120	R	S_Shelf
cg03750567	0.0130652	-0.116416	0.116416	Loss	SYTL1	37	1	27676637	F	Island	Gene_Associated_Cell_type_specific
cg05501320	0.0130652	0.118208	0.118208	Gain	GDAP1;GDAP1	37	8	75263248	R	S_Shore
cg09851528	0.0130652	-0.11384	0.11384	Loss	TMPRSS13	37	11	117778029	R
cg10040530	0.0130652	-0.149478	0.149478	Loss		37	14	104010839	R
cg10775991	0.0130652	-0.0673825	0.0673825	Loss	CHD8	37	14	21905945	R		Promoter_Associated
cg10848724	0.0130652	-0.0973998	0.0973998	Loss	VPS37B	37	12	123380878	R	Island	Promoter_Associated
cg11069430	0.0130652	-0.108224	0.108224	Loss	USP44;USP44	37	12	95945082	F	S_Shelf
cg11213690	0.0130652	-0.0742281	0.0742281	Loss		37	7	149112402	F	Island
cg11697038	0.0130652	-0.0793129	0.0793129	Loss	AHDC1	37	1	27931284	F	S_Shore
cg12234455	0.0130652	-0.0785092	0.0785092	Loss	MAMSTR;MAMSTR	37	19	49220235	F	N_Shelf
cg13182599	0.0130652	-0.0742953	0.0742953	Loss		37	14	69282992	F	N_Shore	Promoter_Associated
cg13942186	0.0130652	0.135311	0.135311	Gain	EXD3	37	9	140305942	F		Unclassified_Cell_type_specific
cg14096569	0.0130652	-0.0778051	0.0778051	Loss	ZBTB22;TAPBP;TAPBP;TAPBP;ZBTB22	37	6	33283064	F	Island
cg17665699	0.0130652	-0.0785586	0.0785586	Loss	ULK2;ULK2	37	17	19771612	F	Island
cg18144560	0.0130652	-0.0987287	0.0987287	Loss	ZBTB22;TAPBP;TAPBP;TAPBP;ZBTB22	37	6	33283070	F	Island
cg19724470	0.0130652	-0.0917669	0.0917669	Loss	CD274	37	9	5450936	F	S_Shore	Promoter_Associated
cg19887750	0.0130652	-0.0965545	0.0965545	Loss	CXXC1;CXXC1	37	18	47813174	F	N_Shore
cg20417500	0.0130652	-0.0504713	0.0504713	Loss	RGNEF	37	5	73109241	R
cg21345949	0.0130652	-0.112204	0.112204	Loss	C10orf125;C10orf125	37	10	135171718	R	Island	Promoter_Associated
cg23004625	0.0130652	-0.0586697	0.0586697	Loss	PIGM	37	1	160002365	R	S_Shore
cg25293806	0.0130652	-0.0899453	0.0899453	Loss	TMEM190	37	19	55889387	F	Island
cg25762706	0.0130652	-0.0739234	0.0739234	Loss	STMN4;STMN4	37	8	27115867	R
cg27261219	0.0130652	-0.0685326	0.0685326	Loss	TMPRSS12	37	12	51236638	R	Island
cg01225565	0.0162623	-0.0640035	0.0640035	Loss	SUV420H1;SUV420H1	37	11	67982143	F	S_Shore
cg02147797	0.0162623	-0.10068	0.10068	Loss	PRICKLE2	37	3	64211204	R		Unclassified_Cell_type_specific
cg02553054	0.0162623	0.076161	0.076161	Gain	SMARCD1;SMARCD1	37	12	50478480	F	N_Shore	Promoter_Associated
cg03278643	0.0162623	-0.0703435	0.0703435	Loss	EVC2;EVC2;EVC2	37	4	5710767	F	S_Shore
cg03484180	0.0162623	-0.0730139	0.0730139	Loss	MON1A;MON1A	37	3	49967517	F	S_Shore	Promoter_Associated
cg03677069	0.0162623	-0.110683	0.110683	Loss	SNCG;SNCG;MMRN2	37	10	88718317	F
cg03717584	0.0162623	0.0928466	0.0928466	Gain	CCDC109A	37	10	74498683	R
cg04755771	0.0162623	-0.0665032	0.0665032	Loss	LOC134466	37	5	150326521	F	S_Shore
cg05962511	0.0162623	-0.0779008	0.0779008	Loss		37	10	102730022	R	S_Shore	Unclassified_Cell_type_specific
cg06806080	0.0162623	-0.0674634	0.0674634	Loss	CD47;CD47;CD47	37	3	107810791	R	S_Shore
cg07038187	0.0162623	-0.0725672	0.0725672	Loss	LOC254559	37	15	89922989	R	S_Shore
cg07890553	0.0162623	-0.0880466	0.0880466	Loss	TMEM39A	37	3	119182858	F		Unclassified
cg07993743	0.0162623	-0.0872463	0.0872463	Loss	WNT9B	37	17	44928288	R	Island
cg10537821	0.0162623	-0.0529677	0.0529677	Loss		37	15	70105522	F
cg10599571	0.0162623	-0.0801898	0.0801898	Loss	MRPS6;SLC5A3	37	21	35445161	F	Island
cg10999598	0.0162623	-0.0604668	0.0604668	Loss	PHAX	37	5	125936257	R	N_Shore	Promoter_Associated
cg11117460	0.0162623	-0.0940639	0.0940639	Loss		37	11	67982542	F	S_Shore	Unclassified_Cell_type_specific
cg12244647	0.0162623	-0.128123	0.128123	Loss	PLXNB2	37	22	50737978	R	Island	Unclassified_Cell_type_specific
cg12308054	0.0162623	0.0566194	0.0566194	Gain	HSPA4	37	5	132386310	R	N_Shore
cg14125353	0.0162623	-0.0693591	0.0693591	Loss		37	10	31892769	F	S_Shore	Unclassified
cg14386691	0.0162623	-0.0504647	0.0504647	Loss	C14orf93;C14orf93;C14orf93	37	14	23479657	R	S_Shore	Promoter_Associated
cg14485633	0.0162623	-0.0843542	0.0843542	Loss	VAV2;VAV2	37	9	136783440	F
cg15175162	0.0162623	-0.169413	0.169413	Loss	FBXL5;FBXL5	37	4	15657657	F	Island
cg16636110	0.0162623	-0.100221	0.100221	Loss	ZNF264	37	19	57702479	F	N_Shore	Promoter_Associated
cg16665444	0.0162623	-0.0573786	0.0573786	Loss	ATP9B	37	18	76828655	R	Island
cg16694639	0.0162623	-0.0636324	0.0636324	Loss	MINPP1	37	10	89264116	F	N_Shore	Promoter_Associated
cg19202014	0.0162623	-0.0571858	0.0571858	Loss	SIGIRR;SIGIRR	37	11	417578	F	Island
cg21209395	0.0162623	-0.0989922	0.0989922	Loss	LOC158381;LOC158381	37	9	35406764	R
cg21769969	0.0162623	-0.0606179	0.0606179	Loss	OSTM1	37	6	108396498	F	S_Shore	Promoter_Associated
cg25970491	0.0162623	-0.0613526	0.0613526	Loss	CLTCL1;CLTCL1	37	22	19279922	F	S_Shore	Promoter_Associated
cg26629730	0.0162623	-0.057711	0.057711	Loss	SCUBE1	37	22	43599560	R
cg00091633	0.0201917	-0.088588	0.088588	Loss	FSTL1	37	3	120170383	R	Island
cg00880984	0.0201917	-0.112698	0.112698	Loss	IBTK	37	6	82958011	F	S_Shore	Promoter_Associated
cg00979931	0.0201917	-0.122197	0.122197	Loss	ATG16L2	37	11	72533664	F	Island	Gene_Associated
cg01961153	0.0201917	-0.0707328	0.0707328	Loss		37	1	41826446	R	N_Shore
cg02087454	0.0201917	-0.0615592	0.0615592	Loss	SRGAP3;SRGAP3	37	3	9292025	R
cg03387723	0.0201917	0.100904	0.100904	Gain	SCMH1	37	1	41708464	F	S_Shore
cg03434624	0.0201917	-0.0932772	0.0932772	Loss	VPS37B	37	12	123380883	R	Island	Promoter_Associated
cg05243389	0.0201917	-0.0775717	0.0775717	Loss	MYEF2	37	15	48470794	F	S_Shore	Promoter_Associated
cg05820241	0.0201917	-0.106499	0.106499	Loss		37	1	232442534	F
cg05845403	0.0201917	-0.104476	0.104476	Loss	DZIP1;DZIP1	37	13	96293882	R	Island
cg05891849	0.0201917	0.0541899	0.0541899	Gain	PIK3R6	37	17	8736136	F		Unclassified_Cell_type_specific
cg06500079	0.0201917	-0.0801619	0.0801619	Loss	VPS53;VPS53	37	17	619033	R	S_Shore	Unclassified_Cell_type_specific
cg07109801	0.0201917	-0.0633784	0.0633784	Loss	MIR425;DALRD3;NDUFAF3;NDUFAF3;NDUFAF3;NDUFAF3	37	3	49057661	F	N_Shore
cg07207043	0.0201917	-0.146685	0.146685	Loss		37	6	7051497	R	Island
cg07895437	0.0201917	-0.147878	0.147878	Loss	ZBTB22;TAPBP;TAPBP;TAPBP;ZBTB22	37	6	33282971	R	Island
cg08143875	0.0201917	-0.0845182	0.0845182	Loss	F10	37	13	113784663	F	Island	Unclassified_Cell_type_specific
cg08216808	0.0201917	-0.0940564	0.0940564	Loss	ARPC2;ARPC2	37	2	219081385	R	N_Shore
cg08373610	0.0201917	-0.0692308	0.0692308	Loss	RFTN2	37	2	198540621	F
cg08666956	0.0201917	-0.112406	0.112406	Loss		37	5	107040942	F
cg08929303	0.0201917	-0.0622671	0.0622671	Loss	PFKFB2;PFKFB2	37	1	207227076	R	S_Shore	Promoter_Associated
cg11489251	0.0201917	0.0731579	0.0731579	Gain	BAT1;BAT1	37	6	31508297	R	N_Shore
cg11599830	0.0201917	-0.103785	0.103785	Loss	LMBR1L	37	12	49504967	R	S_Shore	Promoter_Associated
cg11699265	0.0201917	-0.112798	0.112798	Loss	ARPC1B	37	7	98990265	F	Island	Promoter_Associated_Cell_type_specific
cg12184221	0.0201917	-0.0892647	0.0892647	Loss	TMEM39A	37	3	119182840	F		Unclassified
cg12193657	0.0201917	-0.0647477	0.0647477	Loss	C5orf22;RNASEN;RNASEN	37	5	31533258	F	S_Shore
cg12979844	0.0201917	-0.0697917	0.0697917	Loss	SIAH3	37	13	46425929	F
cg13771313	0.0201917	-0.163705	0.163705	Loss	ATG16L2	37	11	72533295	R	Island	Gene_Associated
cg14565151	0.0201917	-0.109982	0.109982	Loss	USP44	37	12	95945384	R	S_Shelf
cg15089111	0.0201917	0.163259	0.163259	Gain	NPAS3;NPAS3;NPAS3;NPAS3	37	14	34270113	F	Island
cg15452204	0.0201917	-0.0840257	0.0840257	Loss	CDX1	37	5	149546471	R	Island
cg17055704	0.0201917	-0.113331	0.113331	Loss	ZBTB22;TAPBP;TAPBP;TAPBP;ZBTB22	37	6	33282879	R	Island
cg17341345	0.0201917	-0.112163	0.112163	Loss	CCNH	37	5	86709409	R	S_Shore
cg18364502	0.0201917	-0.0738056	0.0738056	Loss	RBM25	37	14	73524688	F	N_Shore	Unclassified
cg18893793	0.0201917	-0.107576	0.107576	Loss	AMIGO2;AMIGO2	37	12	47472810	R	N_Shore	Promoter_Associated
cg19617897	0.0201917	-0.0761676	0.0761676	Loss	THSD4	37	15	71818628	R
cg19793809	0.0201917	-0.0598097	0.0598097	Loss		37	5	132166663	R	Island
cg21179831	0.0201917	0.0541888	0.0541888	Gain	BAT1;BAT1	37	6	31508137	R	N_Shore
cg21291449	0.0201917	-0.0559262	0.0559262	Loss	C6orf136;C6orf136;C6orf136	37	6	30614400	R	N_Shore
cg21306775	0.0201917	-0.0605638	0.0605638	Loss		37	18	74402010	R
cg22778145	0.0201917	-0.100361	0.100361	Loss	CLK4	37	5	178054469	F	S_Shore
cg23695990	0.0201917	-0.0751061	0.0751061	Loss		37	12	95967811	R
cg26201213	0.0201917	-0.0790127	0.0790127	Loss	MGMT	37	10	131265796	R	S_Shore	Promoter_Associated
cg26619624	0.0201917	-0.130797	0.130797	Loss	SHFM1	37	7	96339434	F	S_Shore	Promoter_Associated_Cell_type_specific
cg27214378	0.0201917	-0.0583119	0.0583119	Loss	ODZ4	37	11	78938084	R
cg00105512	0.0250499	-0.0787686	0.0787686	Loss	SYCE1L	37	16	77245845	F	N_Shore	Promoter_Associated
cg00576075	0.0250499	-0.0786104	0.0786104	Loss	C1orf52;C1orf52	37	1	85725654	R	S_Shore	Promoter_Associated
cg01804429	0.0250499	-0.0725858	0.0725858	Loss	YTHDC1;YTHDC1	37	4	69216077	R	S_Shore	Promoter_Associated
cg02723291	0.0250499	-0.0525972	0.0525972	Loss	ETNK1;ETNK1	37	12	22777465	R	N_Shore
cg03736781	0.0250499	-0.0533072	0.0533072	Loss		37	7	158784655	R	N_Shore
cg04993130	0.0250499	-0.103301	0.103301	Loss	EPS8L2	37	11	726759	R	Island	Unclassified
cg05812266	0.0250499	-0.0545495	0.0545495	Loss	GABBR1;GABBR1;GABBR1	37	6	29595194	R	N_Shore
cg05925894	0.0250499	-0.0709919	0.0709919	Loss	DDAH1;DDAH1	37	1	85931301	R	S_Shore
cg06382559	0.0250499	0.0566443	0.0566443	Gain	TLX1	37	10	102896640	R	Island
cg06513695	0.0250499	-0.0815582	0.0815582	Loss		37	22	29866414	R	Island	Promoter_Associated
cg07207490	0.0250499	-0.057835	0.057835	Loss	PHLDB1;PHLDB1;PHLDB1	37	11	118492463	R		Unclassified_Cell_type_specific
cg07417745	0.0250499	-0.0547231	0.0547231	Loss	SLC19A3	37	2	228582488	R	Island
cg09546802	0.0250499	-0.0748945	0.0748945	Loss	PRELID2;PRELID2;PRELID2	37	5	145215546	R	S_Shore
cg09711113	0.0250499	-0.081999	0.081999	Loss	NLGN2	37	17	7311964	F	Island	Unclassified_Cell_type_specific
cg12652585	0.0250499	-0.0867558	0.0867558	Loss	C6orf195	37	6	2634373	R	Island	Unclassified
cg13202221	0.0250499	-0.069784	0.069784	Loss	TM2D3;TM2D3	37	15	102193228	F	Island	Promoter_Associated
cg14160968	0.0250499	-0.0660284	0.0660284	Loss		37	4	77723057	F	N_Shore
cg14219900	0.0250499	0.0577444	0.0577444	Gain		37	1	156119542	R		Unclassified_Cell_type_specific
cg14230606	0.0250499	-0.105375	0.105375	Loss	PLEKHH2;LOC728819	37	2	43903526	R
cg16151651	0.0250499	-0.188663	0.188663	Loss		37	2	1609119	R
cg18046677	0.0250499	-0.0653521	0.0653521	Loss	MAMSTR;MAMSTR;MAMSTR	37	19	49220142	R	N_Shelf	Unclassified_Cell_type_specific
cg18876602	0.0250499	-0.059976	0.059976	Loss	CAP2	37	6	17393472	R
cg19179572	0.0250499	-0.102153	0.102153	Loss	HEXDC;C17orf101;C17orf101	37	17	80377872	R	S_Shore	Promoter_Associated
cg19334452	0.0250499	-0.145564	0.145564	Loss	TLE2;TLE2;TLE2	37	19	3006438	F	Island	Unclassified_Cell_type_specific
cg19514469	0.0250499	-0.0732201	0.0732201	Loss	ELMO3	37	16	67233432	F	Island	Gene_Associated
cg19801120	0.0250499	-0.0635703	0.0635703	Loss	KLHL31	37	6	53530570	R
cg20721320	0.0250499	-0.0524704	0.0524704	Loss	AGXT2L2	37	5	177660036	R	S_Shore	Promoter_Associated
cg21518299	0.0250499	-0.0798705	0.0798705	Loss		37	2	889346	R
cg22510139	0.0250499	0.0549821	0.0549821	Gain	PRDM16;PRDM16	37	1	3058822	F	N_Shore
cg23047271	0.0250499	-0.0807265	0.0807265	Loss	PRICKLE2;PRICKLE2	37	3	64210991	F		Unclassified_Cell_type_specific
cg23397023	0.0250499	-0.0770622	0.0770622	Loss		37	7	149112887	R	S_Shore
cg24664957	0.0250499	-0.0901727	0.0901727	Loss	VPS37B	37	12	123381003	F	S_Shore	Promoter_Associated
cg24728542	0.0250499	-0.0528287	0.0528287	Loss	C6orf64	37	6	39083205	F	S_Shore	Promoter_Associated
cg25213362	0.0250499	-0.0906647	0.0906647	Loss	TMPRSS12	37	12	51236634	R	Island
cg25658983	0.0250499	-0.0801394	0.0801394	Loss	SIAH3	37	13	46426026	R
cg25954512	0.0250499	-0.0778778	0.0778778	Loss	ZBTB22;TAPBP;TAPBP;TAPBP;ZBTB22	37	6	33283021	F	Island
cg26893699	0.0250499	-0.0812709	0.0812709	Loss		37	17	68851883	R
cg00857137	0.0292599	-0.0572067	0.0572067	Loss	TLE2;TLE2;TLE2	37	19	3006720	F	Island
cg01060471	0.0292599	-0.0561261	0.0561261	Loss	NOLC1	37	10	103911733	F	Island	Promoter_Associated
cg01060964	0.0292599	-0.0796331	0.0796331	Loss	CDK5RAP1;CDK5RAP1	37	20	31989983	F	S_Shore	Promoter_Associated
cg01274660	0.0292599	0.0508234	0.0508234	Gain	TRIP6	37	7	100465625	R	S_Shore
cg01560676	0.0292599	-0.0818019	0.0818019	Loss	ERGIC1	37	5	172260799	R	N_Shore	Promoter_Associated
cg02634341	0.0292599	-0.110149	0.110149	Loss	FAM163A	37	1	179711583	F	N_Shore
cg02654291	0.0292599	-0.0541967	0.0541967	Loss	C9orf64	37	9	86572014	R	Island	Unclassified_Cell_type_specific
cg03566479	0.0292599	0.0537444	0.0537444	Gain	TP53I3;TP53I3	37	2	24307957	F	S_Shore	Promoter_Associated
cg03971454	0.0292599	-0.0552756	0.0552756	Loss	TIE1	37	1	43770557	F	Island
cg04042248	0.0292599	-0.0878822	0.0878822	Loss		37	2	11214061	R		Unclassified_Cell_type_specific
cg04078118	0.0292599	-0.0514012	0.0514012	Loss	TNRC6B	37	22	40439969	R	N_Shore	Promoter_Associated
cg04768368	0.0292599	-0.0664296	0.0664296	Loss	TACC2;TACC2	37	10	123779362	F
cg06303238	0.0292599	-0.119021	0.119021	Loss	SALL4;SALL4	37	20	50418959	R	Island
cg06396119	0.0292599	-0.0814193	0.0814193	Loss		37	13	49792767	R	N_Shore
cg06485521	0.0292599	-0.0548232	0.0548232	Loss	KLHL31	37	6	53530600	R
cg06675483	0.0292599	-0.0529136	0.0529136	Loss	LOC100270746;C6orf41	37	6	26987649	F	Island
cg06707970	0.0292599	-0.0504389	0.0504389	Loss	CDH4	37	20	59962861	R	N_Shelf
cg07448319	0.0292599	-0.0591305	0.0591305	Loss	ZNF620;ZNF620	37	3	40547217	F	N_Shore	Promoter_Associated
cg08352755	0.0292599	-0.0608847	0.0608847	Loss		37	5	145758879	F	Island
cg08436089	0.0292599	-0.0659319	0.0659319	Loss	GEMIN7;GEMIN7;GEMIN7	37	19	45594493	R	Island	Promoter_Associated
cg09570614	0.0292599	-0.0600841	0.0600841	Loss		37	2	112124380	R
cg09571713	0.0292599	-0.0921671	0.0921671	Loss	SPOCK3;SPOCK3	37	4	168154775	R	N_Shore
cg09645336	0.0292599	-0.0798152	0.0798152	Loss	C5orf43	37	5	60458807	F	S_Shore
cg10626063	0.0292599	-0.0718337	0.0718337	Loss	SPRED3;SPRED3	37	19	38881032	R	S_Shore
cg10997906	0.0292599	-0.0933428	0.0933428	Loss	ADAMTS2;ADAMTS2	37	5	178753803	F
cg12283398	0.0292599	-0.0733683	0.0733683	Loss	ZBTB46	37	20	62406964	F	Island	Unclassified
cg14103343	0.0292599	-0.0596367	0.0596367	Loss	MAMSTR;MAMSTR	37	19	49220223	F	N_Shelf
cg14518658	0.0292599	-0.0728035	0.0728035	Loss		37	22	37726676	F	N_Shelf	Unclassified_Cell_type_specific
cg14741691	0.0292599	-0.120263	0.120263	Loss	PLD3;PLD3;C19orf47	37	19	40855329	F	S_Shore	Promoter_Associated
cg15090036	0.0292599	-0.0529488	0.0529488	Loss		37	17	48706075	R
cg15365218	0.0292599	-0.0553743	0.0553743	Loss		37	11	33396859	F	N_Shore
cg15442037	0.0292599	-0.0917763	0.0917763	Loss		37	11	69286293	F	Island
cg16024916	0.0292599	-0.0631212	0.0631212	Loss	SYT3;SYT3;SYT3	37	19	51141413	F	N_Shore
cg17242664	0.0292599	-0.0610713	0.0610713	Loss	EVC2;EVC2;EVC2	37	4	5710761	F	S_Shore
cg19401033	0.0292599	-0.122731	0.122731	Loss		37	3	107148372	F	N_Shore	Unclassified
cg19739906	0.0292599	-0.123706	0.123706	Loss	HNMT;HNMT;HNMT	37	2	138722326	R
cg21012874	0.0292599	-0.0790913	0.0790913	Loss	SNCG;SNCG;MMRN2	37	10	88718393	F
cg23376861	0.0292599	-0.0551983	0.0551983	Loss	ATP5A1;ATP5A1	37	18	43678713	F	S_Shore	Unclassified
cg23526586	0.0292599	-0.0916901	0.0916901	Loss		37	12	105917092	F
cg24687970	0.0292599	-0.0517332	0.0517332	Loss	ATAD3C	37	1	1397896	R	S_Shore
cg24907270	0.0292599	-0.0688162	0.0688162	Loss	MTX3;MTX3	37	5	79287410	F	S_Shore	Promoter_Associated
cg24959134	0.0292599	-0.0735801	0.0735801	Loss		37	12	97568165	R
cg25400396	0.0292599	-0.0625123	0.0625123	Loss	ZNF814	37	19	58400559	F	S_Shore	NonGene_Associated
cg27281093	0.0292599	-0.113968	0.113968	Loss	USP18	37	22	18632404	R	N_Shore	Promoter_Associated
cg27461259	0.0292599	-0.0941053	0.0941053	Loss	PPARGC1A	37	4	23892621	R
cg00062245	0.0356893	-0.0515124	0.0515124	Loss	ITGA2B	37	17	42462260	R	Island	Unclassified
cg00652772	0.0356893	-0.0713081	0.0713081	Loss		37	2	102867420	R	Island	Unclassified_Cell_type_specific
cg01695406	0.0356893	-0.06804	0.06804	Loss	TMEM190	37	19	55889276	R	Island
cg01721313	0.0356893	0.0678769	0.0678769	Gain		37	3	169751609	F	N_Shelf	Unclassified_Cell_type_specific
cg02006647	0.0356893	-0.0858798	0.0858798	Loss	EXOC3L2	37	19	45738115	R	Island
cg02487233	0.0356893	-0.098454	0.098454	Loss	CD47;CD47;CD47	37	3	107810687	F	S_Shore
cg02965178	0.0356893	-0.0912169	0.0912169	Loss	AKTIP;AKTIP	37	16	53538660	R	S_Shore
cg05077231	0.0356893	-0.0732913	0.0732913	Loss	MLNR	37	13	49793054	F	N_Shore
cg05198819	0.0356893	-0.0966191	0.0966191	Loss	RAD50;RAD50	37	5	131892439	R	N_Shore	Promoter_Associated
cg05465935	0.0356893	-0.0694852	0.0694852	Loss	C5orf34	37	5	43515805	F	S_Shore	Promoter_Associated_Cell_type_specific
cg05920383	0.0356893	-0.0540314	0.0540314	Loss		37	11	43291188	F
cg06693983	0.0356893	-0.141677	0.141677	Loss	TMEM190	37	19	55889216	R	Island
cg06825512	0.0356893	-0.10089	0.10089	Loss	APCDD1	37	18	10453969	F	N_Shore
cg07022591	0.0356893	-0.0681826	0.0681826	Loss		37	5	106434764	R
cg07104958	0.0356893	-0.0577672	0.0577672	Loss	ANUBL1;ANUBL1	37	10	46168551	F	Island
cg08870143	0.0356893	-0.0831874	0.0831874	Loss	NLGN2	37	17	7312081	F	S_Shore	Unclassified_Cell_type_specific
cg09092525	0.0356893	-0.0795247	0.0795247	Loss	CDH26;CDH26	37	20	58570133	F
cg09390350	0.0356893	-0.0716143	0.0716143	Loss		37	8	114451137	F
cg09568217	0.0356893	-0.0835531	0.0835531	Loss	NLGN2	37	17	7311868	F	Island	Unclassified_Cell_type_specific
cg09684846	0.0356893	-0.0937364	0.0937364	Loss	FAM18A	37	16	10912718	R	Island
cg09772075	0.0356893	-0.0756619	0.0756619	Loss		37	8	20159446	R	N_Shore
cg09871637	0.0356893	-0.0830261	0.0830261	Loss	LMO4	37	1	87800511	F	N_Shore	Promoter_Associated
cg10436410	0.0356893	-0.0588583	0.0588583	Loss	MDFIC;MDFIC;MDFIC	37	7	114561988	R	N_Shore
cg10767045	0.0356893	-0.0568514	0.0568514	Loss	MINPP1	37	10	89264128	F	N_Shore	Promoter_Associated
cg11071193	0.0356893	-0.133128	0.133128	Loss	SCFD1;SCFD1	37	14	31090535	F
cg12287936	0.0356893	-0.0504748	0.0504748	Loss	NDUFS6;MRPL36	37	5	1800606	F	Island
cg13791092	0.0356893	-0.0860316	0.0860316	Loss	PSMF1;PSMF1	37	20	1098787	R	N_Shore	Unclassified
cg14399930	0.0356893	-0.115523	0.115523	Loss	FBXO47	37	17	37123669	F		Unclassified_Cell_type_specific
cg14557202	0.0356893	-0.0729863	0.0729863	Loss	ZNF385A;ZNF385A;ZNF385A	37	12	54764371	F	Island
cg15001381	0.0356893	-0.100345	0.100345	Loss	AXIN1;AXIN1	37	16	403314	R		Promoter_Associated
cg15169829	0.0356893	-0.0670397	0.0670397	Loss	TMPRSS12	37	12	51236693	F	Island
cg16467811	0.0356893	-0.0637586	0.0637586	Loss		37	4	139832064	F
cg16624888	0.0356893	-0.0847634	0.0847634	Loss		37	12	109711141	R
cg17055821	0.0356893	-0.136972	0.136972	Loss	C17orf75	37	17	30669476	F	S_Shore	Promoter_Associated
cg17594670	0.0356893	-0.068138	0.068138	Loss		37	1	209749962	F		Unclassified
cg18852096	0.0356893	-0.116645	0.116645	Loss	MIB2;MIB2;MIB2;MIB2;MIB2;MIB2	37	1	1564425	R	Island
cg20000805	0.0356893	-0.0860865	0.0860865	Loss		37	1	97046756	R
cg21363811	0.0356893	-0.113461	0.113461	Loss	FAM163A	37	1	179713950	F	Island
cg21401642	0.0356893	-0.0904912	0.0904912	Loss		37	4	174421114	F	N_Shore
cg25786696	0.0356893	-0.134816	0.134816	Loss		37	19	44406241	R	S_Shore	Unclassified
cg26493224	0.0356893	-0.0536474	0.0536474	Loss	THSD1;THSD1	37	13	52980671	F	S_Shore	Unclassified_Cell_type_specific
cg26950867	0.0356893	-0.0893632	0.0893632	Loss	FN1;FN1;FN1;FN1;FN1;FN1;FN1	37	2	216299856	F	N_Shore	Unclassified_Cell_type_specific
cg27248148	0.0356893	-0.0665325	0.0665325	Loss		37	13	101241225	F	Island	Promoter_Associated
cg00691240	0.042676	-0.0961692	0.0961692	Loss	TXNDC12;KTI12	37	1	52498502	R	Island	Promoter_Associated
cg00729875	0.042676	-0.0834359	0.0834359	Loss	PALMD;PALMD	37	1	100111713	R
cg02017534	0.042676	-0.0600061	0.0600061	Loss	SIAH3	37	13	46425999	R
cg02841199	0.042676	-0.120462	0.120462	Loss	LCA5;LCA5	37	6	80247907	F	S_Shore
cg03658578	0.042676	-0.0725841	0.0725841	Loss	SLC7A14	37	3	170304031	F	S_Shore
cg05301470	0.042676	-0.101375	0.101375	Loss		37	6	28558006	F	S_Shelf
cg06294700	0.042676	-0.0572047	0.0572047	Loss		37	5	64330959	F	N_Shore	Promoter_Associated
cg06889971	0.042676	-0.0724204	0.0724204	Loss	LOC728723;ZBED3	37	5	76384057	F	S_Shore
cg07038400	0.042676	-0.0784497	0.0784497	Loss	PPP2R3A	37	3	135684163	F	N_Shore	Unclassified
cg07928883	0.042676	-0.0702878	0.0702878	Loss		37	7	149112940	F	S_Shore
cg08530838	0.042676	0.0796256	0.0796256	Gain		37	5	114193858	F
cg08719380	0.042676	-0.073193	0.073193	Loss	CACNB4;CACNB4;CACNB4;CACNB4	37	2	152830505	R
cg09499421	0.042676	-0.0530596	0.0530596	Loss	STX1B	37	16	31020735	R		Unclassified_Cell_type_specific
cg09560161	0.042676	-0.0584521	0.0584521	Loss	PRKCZ;PRKCZ;PRKCZ	37	1	2065242	R	N_Shore	Promoter_Associated
cg09970023	0.042676	-0.070482	0.070482	Loss	SIX4	37	14	61191253	F	S_Shore
cg10119082	0.042676	-0.0684711	0.0684711	Loss	ARPC1B	37	7	98990626	R	Island	Promoter_Associated_Cell_type_specific
cg10428938	0.042676	-0.123154	0.123154	Loss	ARPC1B	37	7	98990837	F	Island	Promoter_Associated_Cell_type_specific
cg10446869	0.042676	-0.0550335	0.0550335	Loss	TRIM46	37	1	155147431	R	Island
cg10730435	0.042676	-0.074638	0.074638	Loss		37	15	99987955	R
cg12561497	0.042676	-0.054481	0.054481	Loss	PP14571;GPC1	37	2	241395678	R	Island	Unclassified
cg12629244	0.042676	-0.0544439	0.0544439	Loss	FAM20B	37	1	178994355	F	N_Shore
cg13320683	0.042676	-0.0572186	0.0572186	Loss	RHOBTB1;RHOBTB1	37	10	62761819	R	S_Shore
cg14307853	0.042676	-0.0672699	0.0672699	Loss	CKS2	37	9	91924749	R	N_Shore	Promoter_Associated
cg14454477	0.042676	-0.103295	0.103295	Loss	PLEKHH2;LOC728819	37	2	43903900	R		Unclassified_Cell_type_specific
cg14473643	0.042676	-0.131989	0.131989	Loss	ZBTB22;TAPBP;TAPBP;TAPBP;ZBTB22	37	6	33282885	R	Island
cg14809332	0.042676	-0.110957	0.110957	Loss	C8orf73;C8orf73	37	8	144654887	F	S_Shore
cg15825059	0.042676	-0.0714392	0.0714392	Loss	RDX	37	11	110167871	F	S_Shore
cg17261125	0.042676	-0.0543283	0.0543283	Loss	LOC254312;LOC254312;LOC254312	37	10	10994495	F
cg17657179	0.042676	-0.0680872	0.0680872	Loss	HAS1	37	19	52227309	R
cg18383668	0.042676	-0.163834	0.163834	Loss	GEMIN7;GEMIN7;GEMIN7	37	19	45594410	F	Island	Promoter_Associated
cg19264571	0.042676	-0.0858441	0.0858441	Loss	APCDD1	37	18	10454085	F	Island
cg19916659	0.042676	-0.118099	0.118099	Loss	MIR548N	37	2	179387931	R		Promoter_Associated
cg21050001	0.042676	0.0709104	0.0709104	Gain	SLC1A3;SLC1A3	37	5	36662804	R
cg21531689	0.042676	-0.0644179	0.0644179	Loss	DNPEP	37	2	220253653	F	S_Shore
cg21583668	0.042676	-0.0625728	0.0625728	Loss	MON1A;MON1A	37	3	49967678	R	S_Shore	Promoter_Associated
cg22950598	0.042676	-0.0603802	0.0603802	Loss	GDF11	37	12	56139862	R	S_Shelf
cg25017060	0.042676	-0.0828505	0.0828505	Loss	AMN;AMN	37	14	103389017	R	Island	Unclassified
cg26717563	0.042676	-0.124768	0.124768	Loss	TLE2;TLE2;TLE2	37	19	3006111	R	N_Shore
cg26841068	0.042676	-0.0578297	0.0578297	Loss	PRELP;PRELP	37	1	203456691	F	N_Shore	Unclassified
cg00181432	0.0492668	0.0643227	0.0643227	Gain	LSG1	37	3	194393818	F	S_Shore
cg00206639	0.0492668	-0.0911867	0.0911867	Loss		37	15	99987871	F
cg00246121	0.0492668	-0.0614497	0.0614497	Loss	FCHSD1	37	5	141030607	F	N_Shore	Promoter_Associated
cg00641210	0.0492668	-0.0623725	0.0623725	Loss	BCL6B	37	17	6927329	F	Island	Unclassified
cg01427957	0.0492668	-0.0615356	0.0615356	Loss	TNRC4	37	1	151689979	F		Unclassified_Cell_type_specific
cg01930676	0.0492668	-0.0734232	0.0734232	Loss	MRPL1	37	4	78783082	F	N_Shore	Promoter_Associated_Cell_type_specific
cg01969701	0.0492668	-0.107609	0.107609	Loss		37	11	69286145	F	Island
cg02159271	0.0492668	-0.0588444	0.0588444	Loss	ZNF76	37	6	35226260	F	N_Shore
cg02564523	0.0492668	-0.0984503	0.0984503	Loss	ORAI2;ORAI2	37	7	102073539	F	N_Shore	Promoter_Associated
cg02630888	0.0492668	-0.0528864	0.0528864	Loss	FBXL5;FBXL5	37	4	15657820	F	S_Shore
cg02856402	0.0492668	-0.540756	0.540756	Loss	HMOX2;HMOX2;HMOX2;HMOX2	37	16	4560300	F
cg03826642	0.0492668	-0.112	0.112	Loss		37	6	10268858	F
cg04004904	0.0492668	-0.0562783	0.0562783	Loss	C10orf111;RPP38;RPP38;RPP38	37	10	15138605	F	N_Shore	Promoter_Associated
cg04440885	0.0492668	-0.098798	0.098798	Loss		37	16	51146856	R	N_Shore
cg04606020	0.0492668	-0.0666111	0.0666111	Loss	GDF11	37	12	56139467	R	S_Shore
cg04664161	0.0492668	-0.0670341	0.0670341	Loss		37	19	1876758	R	Island
cg05079544	0.0492668	-0.104433	0.104433	Loss	N4BP1	37	16	48644408	R	S_Shore	Promoter_Associated
cg05250932	0.0492668	-0.117598	0.117598	Loss	TNNT1;TNNT1;TNNT1	37	19	55644229	R		Unclassified_Cell_type_specific
cg05499178	0.0492668	-0.0827501	0.0827501	Loss		37	11	69285980	F	Island
cg06060835	0.0492668	-0.091257	0.091257	Loss	CFB;CFB	37	6	31913809	R
cg06789445	0.0492668	-0.0823182	0.0823182	Loss	MITF;MITF;MITF;MITF	37	3	69942668	F
cg06957790	0.0492668	-0.0709923	0.0709923	Loss	KIAA0907	37	1	155904847	F	S_Shore	Promoter_Associated
cg07263322	0.0492668	-0.054343	0.054343	Loss		37	2	222657752	F
cg07716847	0.0492668	-0.0977653	0.0977653	Loss	ELMO3	37	16	67233549	F	Island	Gene_Associated
cg07960762	0.0492668	-0.0758118	0.0758118	Loss	PALMD;PALMD	37	1	100111727	R
cg08047939	0.0492668	-0.0550101	0.0550101	Loss	ZNF264	37	19	57702652	R	N_Shore	Promoter_Associated
cg11025974	0.0492668	-0.0735826	0.0735826	Loss	CACNB4;CACNB4;CACNB4;CACNB4	37	2	152830521	R
cg12598235	0.0492668	-0.0644904	0.0644904	Loss	LOC254559	37	15	89921182	R	Island	Unclassified_Cell_type_specific
cg12902206	0.0492668	0.116481	0.116481	Gain	DNAH1	37	3	52351487	F		Unclassified_Cell_type_specific
cg12980795	0.0492668	-0.0847302	0.0847302	Loss		37	5	85056547	F
cg13058710	0.0492668	-0.0903759	0.0903759	Loss	SOX9	37	17	70119609	F	Island	Unclassified
cg13840445	0.0492668	-0.0564589	0.0564589	Loss	KLHL31	37	6	53530628	R
cg14457311	0.0492668	-0.0640478	0.0640478	Loss	CACNA1G;CACNA1G;CACNA1G;CACNA1G;CACNA1G;CACNA1G;CACNA1G;CACNA1G;CACNA1G;CACNA1G;CACNA1G;CACNA1G;CACNA1G;CACNA1G	37	17	48698799	R		Unclassified_Cell_type_specific
cg16661269	0.0492668	-0.0689821	0.0689821	Loss	PAX3;PAX3;PAX3;PAX3;PAX3;PAX3	37	2	223103743	F
cg17328665	0.0492668	-0.126003	0.126003	Loss	PER3	37	1	7887199	R	Island
cg17835016	0.0492668	-0.0834196	0.0834196	Loss	F10	37	13	113784082	F	Island
cg18369516	0.0492668	-0.152631	0.152631	Loss	ZBTB46	37	20	62406721	F	Island	Unclassified
cg18509185	0.0492668	-0.0690785	0.0690785	Loss	SOBP	37	6	107932497	F
cg19313402	0.0492668	-0.0674857	0.0674857	Loss	SLC30A10	37	1	220102307	F	S_Shore
cg19871388	0.0492668	-0.0959785	0.0959785	Loss	SALL4	37	20	50419082	F	S_Shore
cg20343048	0.0492668	-0.0581106	0.0581106	Loss	CLIC6	37	21	36041527	R	Island
cg21382923	0.0492668	-0.0648194	0.0648194	Loss	SH2D5;SH2D5	37	1	21055163	F	N_Shelf	Unclassified_Cell_type_specific
cg22935653	0.0492668	-0.0644458	0.0644458	Loss	ANKRD31	37	5	74532268	F	N_Shore	Promoter_Associated
cg23678254	0.0492668	0.0562833	0.0562833	Gain	DLGAP5;DLGAP5	37	14	55647471	R		Unclassified_Cell_type_specific
cg24124954	0.0492668	0.0586657	0.0586657	Gain	BAT1;BAT1	37	6	31508106	F	N_Shore
cg24295653	0.0492668	-0.0760768	0.0760768	Loss	FHIT;FHIT	37	3	61237884	R	S_Shore
cg24392955	0.0492668	-0.0612399	0.0612399	Loss	FLJ12825	37	12	54454325	R	Island
cg24460126	0.0492668	-0.169254	0.169254	Loss	FAM163A	37	1	179713828	R	Island
cg24912415	0.0492668	-0.102146	0.102146	Loss	MYH7B	37	20	33585435	R	Island
cg25220979	0.0492668	-0.0914139	0.0914139	Loss	IGF2BP1;IGF2BP1	37	17	47092272	R	S_Shore	Unclassified_Cell_type_specific
cg25749107	0.0492668	-0.115448	0.115448	Loss		37	12	23252261	F
cg25788719	0.0492668	-0.071303	0.071303	Loss	HSPA12B	37	20	3713002	R	N_Shore	Unclassified_Cell_type_specific
cg26885268	0.0492668	-0.0628853	0.0628853	Loss		37	7	149389941	F	Island

## Sheet: Supp. Table 8
Supplementary Table 8. GO Biological Process enrichment terms following GREAT analysis of differentially methylated genes in 16p11.2del signature.
GO Biological Process Term ID	Term Name	Hyper FDR Q-Val	Hyper Fold Enrichment	Hyper Foreground Gene Hits	Total Genes Annotated
GO:0051135	positive regulation of NK T cell activation	0.0193217	43.8352	1	5
GO:0045345	positive regulation of MHC class I biosynthetic process	0.0148073	39.6605	1	4
GO:0051085	chaperone mediated protein folding requiring cofactor	0.0120205	37.8577	1	11
GO:0045343	regulation of MHC class I biosynthetic process	0.010873	36.2117	1	6
GO:0033619	membrane protein proteolysis	0.0254252	16.7917	1	29

## Sheet: Supp. Table 9
Supplementary Table 9. GO Biological Process enrichment terms following GREAT analysis of differentially methylated genes in CHD8+/- signature (top 20 terms).
GO Biological Process Term ID	Term Name	Hyper FDR Q-Val	Hyper Fold Enrichment	Hyper Foreground Gene Hits	Total Genes Annotated
GO:0050823	peptide antigen stabilization	4.12323e-19	74.5144	1	1
GO:0019885	antigen processing and presentation of endogenous peptide antigen via MHC class I	3.44871e-13	29.6537	1	5
GO:0019883	antigen processing and presentation of endogenous antigen	2.32945e-12	25.2701	1	7
GO:0006890	retrograde vesicle-mediated transport, Golgi to ER	3.09364e-09	13.0278	2	23
GO:0006518	peptide metabolic process	6.64752e-05	6.21485	2	88
GO:0097151	positive regulation of inhibitory postsynaptic membrane potential	0.000114221	92.2559	1	1
GO:0060564	negative regulation of mitotic anaphase-promoting complex activity	0.000683753	32.4337	1	4
GO:0072553	terminal button organization	0.00120474	51.894	1	3
GO:0034773	histone H4-K20 trimethylation	0.00120474	51.894	1	4
GO:0043603	cellular amide metabolic process	0.00124859	3.93716	5	151
GO:0008228	opsonization	0.00136765	17.298	2	7
GO:0002479	antigen processing and presentation of exogenous peptide antigen via MHC class I, TAP-dependent	0.00154477	4.51907	2	74
GO:0090266	regulation of mitotic cell cycle spindle assembly checkpoint	0.00149486	24.7114	1	7
GO:0042590	antigen processing and presentation of exogenous peptide antigen via MHC class I	0.00190519	4.38541	2	78
GO:0034770	histone H4-K20 methylation	0.00431518	33.2121	1	6
GO:0033601	positive regulation of mammary gland epithelial cell proliferation	0.0116346	11.2203	2	5
GO:0097105	presynaptic membrane assembly	0.0119467	25.1607	1	8
GO:0021512	spinal cord anterior/posterior patterning	0.0134292	207.576	1	1
GO:0097090	presynaptic membrane organization	0.0152124	23.064	1	9
GO:0002474	antigen processing and presentation of peptide antigen via MHC class I	0.0255035	3.40288	2	100
